# Supplementary material for: A Genome-wide Analysis of Pentatricopeptide Repeat Protein gene family in two Kiwifruit Species with an Emphasis on Roles of RNA Editing in Pathogens Stress
Source: Preprints.org preprint supplement (doi:10.20944/preprints202307.1967.v1), 2023-07-28
Supplement: Supplementary file 1 [file Supplementary.xlsx]

## Sheet: S1
Table S1. Detailed information for PPR genes in the Actinidia chinensis genome.
Gene id	Chromosome	Position		Subfamily	TargetP Prediction	Predotar Prediction	Subcellular localization	Length of Amino acid	Duplication origin
Actinidia00086.t1	Lachesis_group10	16271784	16275261	E	mTP	possibly mitochondrial	mTP	756	segmental
Actinidia00139.t1	Lachesis_group12	6223575	6225584	DYW	noTP	ER	noTP	622	segmental
Actinidia00227.t1	Lachesis_group12	4858957	4865074	P	noTP	possibly ER	noTP	632	segmental
Actinidia00245.t1	Lachesis_group12	4692250	4694963	E	noTP	none	noTP	625	segmental
Actinidia00395.t1	Lachesis_group12	3151256	3152422	P	noTP	none	noTP	295	segmental
Actinidia00477.t1	Lachesis_group12	2266853	2268684	DYW	noTP	none	noTP	550	segmental
Actinidia00616.t1	Lachesis_group12	897092	899234	E+	noTP	possibly mitochondrial	mTP	685	segmental
Actinidia00669.t1	Lachesis_group21	15531033	15532780	P	mTP	none	mTP	310	dispersed
Actinidia00858.t1	Lachesis_group15	13953753	13956186	P	noTP	mitochondrial	mTP	457	segmental
Actinidia00869.t1	Lachesis_group15	14080484	14082597	P	mTP	mitochondrial	mTP	440	segmental
Actinidia01117.t1	Lachesis_group0	23105396	23108794	P	noTP	possibly mitochondrial	mTP	630	segmental
Actinidia01274.t1	Lachesis_group18	4614030	4616483	E	noTP	none	noTP	553	segmental
Actinidia01285.t1	Lachesis_group18	4763886	4767787	P	mTP	mitochondrial	mTP	1081	segmental
Actinidia01294.t1	Lachesis_group18	4935177	4938477	E	noTP	possibly ER	noTP	512	segmental
Actinidia01299.t1	Lachesis_group18	5042368	5044900	P	noTP	plastid	cTP	809	segmental
Actinidia01332.t1	Lachesis_group18	5605414	5607992	E+	luTP	none	cTP	650	segmental
Actinidia01363.t1	Lachesis_group10	4143759	4148702	P	noTP	none	noTP	253	segmental
Actinidia01390.t1	Lachesis_group8	1165	4703	P	noTP	none	noTP	700	segmental
Actinidia01524.t1	Lachesis_group26	13387329	13392386	DYW	noTP	possibly mitochondrial	mTP	864	segmental
Actinidia01624.t1	Lachesis_group26	14726190	14731690	E+	noTP	none	noTP	827	segmental
Actinidia01627.t1	Lachesis_group26	14792554	14798697	P	noTP	none	noTP	314	segmental
Actinidia01734.t1	Lachesis_group1	3202728	3205711	E+	cTP	possibly ER	cTP	778	segmental
Actinidia01760.t1	Lachesis_group1	2977350	2985966	P	noTP	none	noTP	1073	segmental
Actinidia01778.t1	Lachesis_group1	2809548	2816846	DYW	noTP	plastid	cTP	1475	segmental
Actinidia01881.t1	Lachesis_group0	2733407	2736133	E+	noTP	none	noTP	658	segmental
Actinidia01885.t1	Lachesis_group0	2694100	2698116	P	mTP	mitochondrial	mTP	509	segmental
Actinidia01961.t1	Lachesis_group11	14423867	14426258	E	noTP	possibly mitochondrial	mTP	587	segmental
Actinidia01971.t1	Lachesis_group11	14545163	14547571	E+	noTP	none	noTP	745	segmental
Actinidia02289.t1	Lachesis_group20	296670	299040	P	noTP	none	noTP	583	segmental
Actinidia02456.t1	Lachesis_group10	10376238	10377930	E	mTP	possibly mitochondrial	mTP	516	segmental
Actinidia02637.t1	Lachesis_group1	16307773	16310076	P	noTP	none	noTP	497	segmental
Actinidia03030.t1	Lachesis_group22	7345562	7356420	P	noTP	none	noTP	233	segmental
Actinidia03250.t1	Lachesis_group17	8332193	8334740	P	noTP	none	noTP	686	segmental
Actinidia03522.t1	Lachesis_group27	8168116	8170586	E+	noTP	none	noTP	631	segmental
Actinidia03531.t1	Lachesis_group27	8472617	8475812	DYW	mTP	mitochondrial	mTP	866	segmental
Actinidia03646.t1	Lachesis_group9	14258206	14260142	P	mTP	mitochondrial	mTP	530	segmental
Actinidia03844.t3	Lachesis_group17	4526844	4543976	P	noTP	none	noTP	967	singleton
Actinidia03863.t1	Contig00263_ERROPOS638863	337008	340015	P	noTP	none	noTP	803	segmental
Actinidia03867.t1	Contig00263_ERROPOS638863	384544	386955	E	noTP	none	noTP	767	proximal
Actinidia03955.t1	Lachesis_group18	10391347	10397513	P	mTP	mitochondrial	mTP	504	segmental
Actinidia03971.t1	Contig00263_ERROPOS2634553	272440	275664	P	noTP	none	noTP	959	segmental
Actinidia03975.t1	Contig00263_ERROPOS2634553	320865	323046	E	noTP	none	noTP	536	proximal
Actinidia04082.t1	Lachesis_group4	21390129	21392163	E	noTP	no terminal Met	noTP	569	dispersed
Actinidia04338.t1	Lachesis_group14	18931136	18938536	E+	mTP	possibly mitochondrial	mTP	1007	segmental
Actinidia04364.t1	Lachesis_group14	19494808	19500897	P	noTP	mitochondrial	mTP	798	segmental
Actinidia04405.t1	Lachesis_group7	14997189	15016418	P	mTP	no terminal Met	mTP	416	dispersed
Actinidia04470.t1	Lachesis_group3	3257853	3267313	P	cTP	none	cTP	649	proximal
Actinidia04473.t1	Lachesis_group3	3202365	3209005	P	noTP	none	noTP	596	tandem
Actinidia04474.t1	Lachesis_group3	3198372	3200468	P	noTP	none	noTP	524	tandem
Actinidia04475.t1	Lachesis_group3	3189409	3193371	P	noTP	plastid	cTP	614	segmental
Actinidia04490.t1	Lachesis_group3	2866975	2870860	E+	noTP	none	noTP	324	segmental
Actinidia04698.t1	Contig00337	42151	44346	P	noTP	possibly plastid	cTP	674	dispersed
Actinidia04871.t1	Lachesis_group1	7781308	7784336	P	noTP	mitochondrial	mTP	691	segmental
Actinidia04872.t1	Lachesis_group1	7776248	7777299	E+	noTP	none	noTP	282	segmental
Actinidia04890.t1	Lachesis_group1	7533573	7535480	E+	mTP	mitochondrial	mTP	603	segmental
Actinidia04897.t1	Lachesis_group1	7390719	7394707	P	noTP	none	noTP	717	segmental
Actinidia04902.t1	Lachesis_group1	7364396	7373479	E	noTP	none	noTP	1063	segmental
Actinidia04930.t1	Lachesis_group1	6873883	6882106	P	noTP	possibly mitochondrial	mTP	700	segmental
Actinidia04949.t1	Lachesis_group1	6620665	6630200	P	cTP	none	cTP	860	segmental
Actinidia04954.t1	Lachesis_group1	6538873	6543910	P	mTP	possibly mitochondrial	mTP	479	segmental
Actinidia05278.t1	Lachesis_group20	9736465	9752354	P	noTP	none	noTP	843	segmental
Actinidia05283.t1	Lachesis_group20	9785746	9787792	E	noTP	none	noTP	608	segmental
Actinidia05301.t1	Lachesis_group20	9989037	9991334	P	cTP	plastid	cTP	541	segmental
Actinidia05343.t1	Lachesis_group20	10646575	10649404	P	noTP	none	noTP	322	segmental
Actinidia05344.t1	Lachesis_group20	10649620	10650307	P	noTP	possibly mitochondrial	mTP	166	dispersed
Actinidia05418.t1	Lachesis_group5	13461898	13464835	DYW	noTP	none	noTP	280	segmental
Actinidia05428.t1	Lachesis_group5	13351645	13353220	P	noTP	none	noTP	448	segmental
Actinidia05532.t1	Lachesis_group20	1260715	1262947	P	noTP	plastid	cTP	528	dispersed
Actinidia05549.t1	Lachesis_group20	1429520	1434196	P	noTP	mitochondrial	mTP	514	segmental
Actinidia05551.t1	Lachesis_group20	1445924	1447226	P	mTP	mitochondrial	mTP	391	proximal
Actinidia05625.t1	Lachesis_group20	2404072	2410522	P	mTP	possibly mitochondrial	mTP	509	segmental
Actinidia05635.t1	Lachesis_group20	2477694	2478727	E+	noTP	none	noTP	290	segmental
Actinidia05652.t1	Lachesis_group20	2677664	2681690	DYW	noTP	possibly mitochondrial	mTP	933	segmental
Actinidia05655.t1	Lachesis_group20	2720034	2722409	P	noTP	possibly mitochondrial	mTP	474	segmental
Actinidia05689.t1	Lachesis_group20	3237639	3239448	P	noTP	possibly mitochondrial	mTP	454	segmental
Actinidia05748.t1	Lachesis_group20	3898615	3902278	E	noTP	none	noTP	692	segmental
Actinidia05776.t1	Lachesis_group20	4258306	4263519	P	noTP	none	noTP	462	segmental
Actinidia05786.t1	Lachesis_group20	4345449	4350408	P	noTP	none	noTP	949	segmental
Actinidia05956.t1	Lachesis_group11	12332381	12333073	P	noTP	none	noTP	199	segmental
Actinidia06003.t1	Lachesis_group11	12880981	12882529	P	noTP	none	noTP	484	segmental
Actinidia06065.t1	Lachesis_group11	13842342	13844863	E	noTP	none	noTP	505	segmental
Actinidia06131.t1	Lachesis_group21	17805490	17808125	E	noTP	none	noTP	832	segmental
Actinidia06229.t1	Lachesis_group20	6988148	6990519	P	noTP	none	noTP	605	segmental
Actinidia06295.t1	Lachesis_group15	16771970	16776386	E+	noTP	plastid	cTP	770	segmental
Actinidia06447.t1	Lachesis_group18	512508	518007	P	noTP	none	noTP	727	segmental
Actinidia06453.t1	Lachesis_group18	597379	598429	E+	noTP	none	noTP	288	segmental
Actinidia06485.t1	Lachesis_group16	11664404	11665858	P	noTP	none	noTP	452	segmental
Actinidia06555.t1	Lachesis_group16	10375628	10377445	E+	noTP	none	noTP	548	segmental
Actinidia06778.t1	Lachesis_group22	10303321	10308709	P	noTP	none	noTP	908	segmental
Actinidia06870.t1	Lachesis_group13	988087	993605	E+	noTP	none	noTP	554	segmental
Actinidia06906.t1	Lachesis_group13	1414532	1417440	DYW	noTP	none	noTP	904	segmental
Actinidia06968.t1	Lachesis_group13	2202654	2207806	P	noTP	none	noTP	519	segmental
Actinidia06986.t1	Lachesis_group13	2370895	2376052	E+	noTP	none	noTP	940	segmental
Actinidia07034.t1	Lachesis_group13	2968184	2969875	P	noTP	possibly mitochondrial	mTP	523	segmental
Actinidia07048.t1	Lachesis_group13	3145996	3149671	P	noTP	none	noTP	902	segmental
Actinidia07235.t1	Lachesis_group13	5382017	5385429	DYW	noTP	none	noTP	738	segmental
Actinidia07257.t1	Lachesis_group13	5677912	5680637	DYW	mTP	none	mTP	734	segmental
Actinidia07385.t1	Lachesis_group10	19579749	19587345	E+	noTP	none	noTP	1038	segmental
Actinidia07466.t1	Lachesis_group2	18277425	18278902	P	noTP	none	noTP	300	segmental
Actinidia07529.t1	Lachesis_group18	8717070	8719284	P	cTP	plastid	cTP	508	segmental
Actinidia07554.t1	Lachesis_group18	9380714	9383046	E+	noTP	none	noTP	513	segmental
Actinidia07655.t1	Lachesis_group6	3037742	3039045	E	noTP	none	noTP	414	segmental
Actinidia07656.t1	Lachesis_group6	3033003	3037687	E	cTP	none	cTP	574	segmental
Actinidia07716.t1	Lachesis_group3	10356860	10359944	DYW	mTP	mitochondrial	mTP	875	segmental
Actinidia07820.t1	Lachesis_group4	3026396	3028437	E	luTP	none	luTP	549	segmental
Actinidia07826.t1	Lachesis_group4	2990353	2992602	P	noTP	none	noTP	539	segmental
Actinidia07831.t1	Contig00394	42778	44477	P	noTP	none	noTP	494	tandem
Actinidia07837.t1	Lachesis_group10	8756949	8761627	E+	noTP	no terminal Met	noTP	679	segmental
Actinidia07859.t1	Lachesis_group19	7941158	7945189	P	mTP	mitochondrial	mTP	1041	segmental
Actinidia07869.t1	Lachesis_group19	8116928	8120537	DYW	noTP	possibly mitochondrial	mTP	1012	segmental
Actinidia08034.t1	Lachesis_group9	3034124	3036391	P	noTP	none	noTP	501	segmental
Actinidia08087.t1	Lachesis_group15	3237172	3238821	E+	noTP	none	noTP	516	segmental
Actinidia08123.t1	Lachesis_group15	2883031	2886670	P	noTP	none	noTP	140	segmental
Actinidia08241.t1	Contig00417	73823	74858	E	noTP	none	noTP	320	dispersed
Actinidia08438.t1	Lachesis_group18	6092425	6099718	P	noTP	none	noTP	571	segmental
Actinidia08466.t1	Lachesis_group18	6462758	6464167	P	mTP	mitochondrial	mTP	378	segmental
Actinidia08478.t1	Lachesis_group18	6590308	6600251	E+	noTP	none	noTP	1059	segmental
Actinidia08488.t1	Lachesis_group18	6719232	6722456	DYW	noTP	plastid	cTP	686	segmental
Actinidia08538.t1	Lachesis_group24	11579785	11581534	E+	noTP	possibly plastid	cTP	538	segmental
Actinidia08636.t1	Lachesis_group6	8483064	8485637	DYW	noTP	possibly plastid	cTP	835	segmental
Actinidia08649.t1	Lachesis_group6	8225204	8227255	P	noTP	none	noTP	656	segmental
Actinidia08731.t1	Lachesis_group6	7374580	7380469	P	noTP	none	noTP	520	segmental
Actinidia08976.t1	Lachesis_group2	1365051	1368717	P	mTP	mitochondrial	mTP	653	segmental
Actinidia09043.t1	Lachesis_group1	21871567	21874683	E	noTP	plastid	cTP	745	segmental
Actinidia09237.t1	Lachesis_group13	13715605	13725272	E+	noTP	none	noTP	1457	segmental
Actinidia09281.t1	Lachesis_group5	17383470	17393668	E+	noTP	none	noTP	792	segmental
Actinidia09322.t1	Lachesis_group5	17940124	17941111	P	noTP	none	noTP	91	segmental
Actinidia09346.t1	Lachesis_group5	18382167	18389828	E+	noTP	none	noTP	791	segmental
Actinidia09353.t1	Lachesis_group5	18479679	18483396	E+	noTP	none	noTP	387	segmental
Actinidia09486.t1	Lachesis_group15	8841787	8842852	E	noTP	none	noTP	329	segmental
Actinidia09786.t1	Lachesis_group5	7071791	7077077	P	mTP	possibly mitochondrial	mTP	633	segmental
Actinidia09797.t1	Lachesis_group5	7278149	7280748	P	noTP	none	noTP	286	segmental
Actinidia09879.t1	Lachesis_group5	2290307	2300201	P	noTP	mitochondrial	mTP	1244	segmental
Actinidia09890.t1	Lachesis_group5	2500323	2502131	E+	mTP	possibly mitochondrial	mTP	563	segmental
Actinidia10043.t1	Lachesis_group0	9515489	9517973	E	noTP	none	noTP	480	segmental
Actinidia10074.t1	Lachesis_group0	8976757	8977355	P	noTP	none	noTP	166	segmental
Actinidia10267.t1	Lachesis_group26	5442212	5446536	P	SP	ER	SP	554	segmental
Actinidia10287.t1	Lachesis_group26	7148210	7149220	E+	noTP	none	noTP	213	segmental
Actinidia10357.t2	Lachesis_group26	5973622	5978027	P	noTP	ER	noTP	560	singleton
Actinidia10371.t1	Lachesis_group26	5792695	5794106	P	noTP	none	noTP	232	segmental
Actinidia10706.t1	Lachesis_group9	7598142	7628457	P	noTP	mitochondrial	mTP	833	segmental
Actinidia10980.t1	Lachesis_group19	1947457	1951798	E+	SP	ER	SP	950	segmental
Actinidia11072.t1	Lachesis_group19	3106437	3107491	P	noTP	none	noTP	291	segmental
Actinidia11313.t1	Lachesis_group21	9047079	9059350	P	mTP	mitochondrial	mTP	1014	segmental
Actinidia11452.t1	Lachesis_group21	11076075	11080452	E+	noTP	possibly mitochondrial	mTP	721	segmental
Actinidia11685.t1	Lachesis_group25	2617430	2626882	P	SP	ER	SP	1050	segmental
Actinidia11691.t1	Lachesis_group25	2503673	2508509	DYW	noTP	none	noTP	664	segmental
Actinidia11727.t1	Lachesis_group25	2054936	2056189	DYW	noTP	none	noTP	255	segmental
Actinidia11778.t1	Lachesis_group14	17097547	17100726	E+	noTP	none	noTP	553	segmental
Actinidia11897.t1	Lachesis_group6	5850496	5861873	E+	noTP	none	noTP	663	segmental
Actinidia11979.t1	Lachesis_group11	17389819	17397442	P	noTP	none	noTP	869	segmental
Actinidia12091.t1	Lachesis_group11	18729886	18732083	E	noTP	none	noTP	698	segmental
Actinidia12217.t1	Lachesis_group25	3984220	3986288	E	noTP	possibly plastid	cTP	603	segmental
Actinidia12264.t1	Lachesis_group25	3311035	3316587	P	cTP	plastid	cTP	417	segmental
Actinidia12324.t1	Lachesis_group4	15202211	15204977	E	noTP	none	noTP	566	segmental
Actinidia12681.t1	Lachesis_group23	13253397	13255403	E	noTP	none	noTP	600	segmental
Actinidia12716.t1	Lachesis_group23	12526028	12527345	P	noTP	possibly plastid	cTP	223	segmental
Actinidia12722.t1	Lachesis_group23	12450311	12453159	E+	noTP	none	noTP	409	segmental
Actinidia12756.t1	Lachesis_group19	201146	204360	P	noTP	none	noTP	426	segmental
Actinidia12757.t1	Lachesis_group19	204402	205643	P	noTP	none	noTP	389	segmental
Actinidia12769.t1	Lachesis_group19	380061	387949	E	noTP	none	noTP	770	segmental
Actinidia12984.t1	Lachesis_group2	15723900	15727497	P	noTP	possibly plastid	cTP	475	segmental
Actinidia13116.t1	Lachesis_group0	23939051	23943676	E	mTP	none	mTP	549	segmental
Actinidia13132.t1	Lachesis_group0	23713261	23715113	P	noTP	none	noTP	563	segmental
Actinidia13220.t1	Lachesis_group18	1425137	1427200	P	mTP	mitochondrial	mTP	552	segmental
Actinidia13244.t1	Lachesis_group18	1744188	1745626	E+	noTP	none	noTP	445	segmental
Actinidia13282.t2	Lachesis_group18	2239488	2242427	P	SP	ER	SP	338	singleton
Actinidia13289.t1	Lachesis_group18	2294728	2298151	P	noTP	possibly mitochondrial	mTP	715	segmental
Actinidia13412.t1	Lachesis_group12	14163478	14166961	DYW	noTP	none	noTP	654	segmental
Actinidia13416.t1	Lachesis_group12	14121729	14123694	E	noTP	none	noTP	612	segmental
Actinidia13442.t1	Lachesis_group12	13218845	13222600	P	noTP	none	noTP	795	segmental
Actinidia13695.t1	Lachesis_group10	5892972	5894910	P	noTP	none	noTP	365	segmental
Actinidia13697.t1	Lachesis_group10	5867927	5880164	P	cTP	possibly plastid	cTP	1090	tandem
Actinidia13699.t1	Lachesis_group10	5850176	5853017	P	noTP	possibly ER	noTP	535	segmental
Actinidia13702.t1	Lachesis_group10	5817079	5820350	P	SP	ER	SP	206	segmental
Actinidia13711.t1	Lachesis_group10	5716541	5719527	E	mTP	mitochondrial	mTP	453	segmental
Actinidia13718.t1	Lachesis_group10	5650354	5657677	P	cTP	possibly mitochondrial	cTP	781	segmental
Actinidia14396.t1	Lachesis_group6	19375269	19379991	P	mTP	plastid	mTP	361	segmental
Actinidia14398.t1	Lachesis_group6	19361285	19363606	E	mTP	possibly mitochondrial	mTP	673	segmental
Actinidia14588.t1	Lachesis_group6	16401042	16409729	E	noTP	none	noTP	866	segmental
Actinidia14651.t1	Lachesis_group14	1778950	1780277	E+	noTP	none	noTP	413	segmental
Actinidia14727.t1	Lachesis_group14	2679044	2680605	P	noTP	none	noTP	389	segmental
Actinidia14730.t1	Lachesis_group14	2748895	2750491	P	noTP	none	noTP	507	proximal
Actinidia14742.t1	Lachesis_group14	2887493	2889327	P	noTP	none	noTP	324	segmental
Actinidia14816.t1	Lachesis_group14	3799947	3802668	P	mTP	mitochondrial	mTP	464	segmental
Actinidia14898.t1	Lachesis_group14	10748532	10750650	E	noTP	possibly mitochondrial	mTP	631	segmental
Actinidia14951.t1	Lachesis_group14	11749355	11757574	P	mTP	mitochondrial	mTP	937	segmental
Actinidia15058.t1	Lachesis_group12	17789506	17795093	E+	noTP	possibly mitochondrial	mTP	1104	segmental
Actinidia15078.t1	Lachesis_group12	18051957	18056164	P	noTP	possibly mitochondrial	mTP	490	segmental
Actinidia15159.t1	Lachesis_group26	8526357	8542515	E+	noTP	none	noTP	960	segmental
Actinidia15160.t1	Lachesis_group26	8542545	8546819	E	noTP	possibly mitochondrial	mTP	606	segmental
Actinidia15164.t1	Lachesis_group26	8688616	8692056	E	noTP	none	noTP	609	proximal
Actinidia15185.t1	Lachesis_group26	8957106	8959300	E+	noTP	none	noTP	643	segmental
Actinidia15216.t1	Lachesis_group26	9658346	9663839	P	luTP	ER	luTP	553	segmental
Actinidia15242.t1	Contig00980	60244	63007	E+	noTP	possibly ER	noTP	464	dispersed
Actinidia15339.t1	Lachesis_group26	2462615	2465945	P	noTP	none	noTP	735	segmental
Actinidia15367.t1	Lachesis_group26	2156250	2157566	E+	noTP	mitochondrial	mTP	339	segmental
Actinidia15390.t1	Lachesis_group26	1928933	1933832	DYW	noTP	none	noTP	841	segmental
Actinidia15490.t1	Lachesis_group26	817029	821344	P	noTP	possibly mitochondrial	mTP	691	segmental
Actinidia15634.t1	Lachesis_group28	6585794	6587656	E+	noTP	possibly mitochondrial	mTP	583	segmental
Actinidia15687.t1	Lachesis_group27	11263445	11268477	P	mTP	mitochondrial	mTP	878	segmental
Actinidia15720.t1	Lachesis_group27	11720575	11722164	E+	noTP	none	noTP	498	segmental
Actinidia15721.t1	Lachesis_group27	11722333	11725921	DYW	noTP	possibly mitochondrial	mTP	816	segmental
Actinidia15785.t1	Lachesis_group27	12627405	12630390	P	noTP	none	noTP	411	segmental
Actinidia15786.t1	Lachesis_group27	12634437	12636080	P	mTP	possibly mitochondrial	mTP	481	tandem
Actinidia16042.t1	Lachesis_group11	9945753	9957191	P	cTP	possibly plastid	cTP	513	segmental
Actinidia16202.t1	Lachesis_group13	9693033	9698911	P	cTP	plastid	cTP	694	segmental
Actinidia16224.t1	Lachesis_group24	52911	54901	E+	noTP	ER	noTP	569	dispersed
Actinidia16320.t1	Lachesis_group24	1516762	1519537	E	noTP	none	noTP	594	segmental
Actinidia16370.t1	Lachesis_group24	2160005	2163038	E	noTP	none	noTP	640	segmental
Actinidia16375.t1	Lachesis_group24	2243795	2257831	P	noTP	possibly plastid	cTP	812	segmental
Actinidia16546.t1	Contig01010_ERROPOS100000	41942	42570	E+	SP	possibly ER	SP	177	segmental
Actinidia16582.t1	Lachesis_group28	8164233	8165929	E	noTP	none	noTP	149	segmental
Actinidia16659.t1	Lachesis_group4	11095001	11096641	E	noTP	none	noTP	446	segmental
Actinidia16747.t1	Lachesis_group12	9788937	9794684	DYW	noTP	none	noTP	751	segmental
Actinidia16780.t1	Lachesis_group12	9118193	9120572	DYW	noTP	none	noTP	691	segmental
Actinidia16861.t1	Lachesis_group12	7933867	7939850	P	noTP	none	noTP	324	segmental
Actinidia16866.t1	Lachesis_group12	7859836	7861968	E	noTP	none	noTP	636	segmental
Actinidia16878.t1	Lachesis_group12	7688568	7691777	E	noTP	possibly mitochondrial	mTP	838	segmental
Actinidia16879.t1	Lachesis_group12	7676619	7686840	E	mTP	none	mTP	1167	segmental
Actinidia16898.t1	Lachesis_group12	7454118	7455620	E+	SP	ER	SP	320	dispersed
Actinidia17037.t1	Lachesis_group28	804619	817058	P	mTP	mitochondrial	mTP	811	segmental
Actinidia17234.t1	Lachesis_group25	12301496	12305134	P	noTP	possibly mitochondrial	mTP	603	segmental
Actinidia17341.t1	Lachesis_group11	1761366	1766053	P	noTP	possibly plastid	cTP	653	segmental
Actinidia17550.t1	Lachesis_group21	3024621	3026689	E+	noTP	none	noTP	478	segmental
Actinidia17686.t1	Lachesis_group21	5286640	5287291	E+	mTP	mitochondrial	mTP	160	dispersed
Actinidia17838.t1	Lachesis_group7	17208278	17210200	P	noTP	none	noTP	598	segmental
Actinidia17852.t1	Lachesis_group7	17020997	17023671	P	noTP	possibly mitochondrial	mTP	710	segmental
Actinidia17867.t1	Lachesis_group7	16657117	16665597	DYW	noTP	none	noTP	705	segmental
Actinidia17908.t1	Lachesis_group24	16611167	16613663	P	noTP	possibly mitochondrial	mTP	504	segmental
Actinidia17915.t1	Lachesis_group24	16689288	16695188	P	noTP	none	noTP	855	segmental
Actinidia17956.t1	Lachesis_group18	11454450	11459719	P	mTP	mitochondrial	mTP	621	segmental
Actinidia17972.t1	Lachesis_group18	11174292	11177807	DYW	noTP	none	noTP	794	segmental
Actinidia17999.t2	Lachesis_group12	217008	221183	P	noTP	none	noTP	892	singleton
Actinidia18032.t1	Lachesis_group12	557049	559637	E	mTP	mitochondrial	mTP	702	segmental
Actinidia18033.t1	Lachesis_group12	561499	564250	E	mTP	mitochondrial	mTP	668	segmental
Actinidia18106.t1	Lachesis_group11	15488970	15494178	P	SP	ER	SP	601	segmental
Actinidia18161.t1	Lachesis_group13	12109660	12112193	P	mTP	plastid	mTP	707	segmental
Actinidia18285.t1	Lachesis_group13	10578715	10588551	E	noTP	none	noTP	689	segmental
Actinidia18293.t1	Lachesis_group13	10494172	10499102	E+	SP	ER	SP	553	segmental
Actinidia18390.t1	Lachesis_group8	13773582	13776701	DYW	noTP	none	noTP	642	segmental
Actinidia18473.t1	Lachesis_group22	17801420	17804457	P	noTP	none	noTP	585	segmental
Actinidia18579.t1	Lachesis_group17	3555633	3561371	E	mTP	possibly mitochondrial	mTP	1018	segmental
Actinidia18612.t1	Lachesis_group17	2868966	2873038	DYW	noTP	none	noTP	651	segmental
Actinidia18623.t1	Lachesis_group17	2661695	2665362	E	noTP	none	noTP	488	segmental
Actinidia18704.t1	Lachesis_group3	23901010	23909577	P	noTP	none	noTP	1053	segmental
Actinidia18764.t1	Lachesis_group9	7030212	7034468	P	noTP	none	noTP	480	segmental
Actinidia18805.t1	Lachesis_group9	6493845	6496098	P	noTP	none	noTP	457	segmental
Actinidia18849.t1	Lachesis_group9	6046358	6050648	E	noTP	none	noTP	819	segmental
Actinidia18905.t1	Lachesis_group9	5478190	5480587	E	noTP	none	noTP	570	segmental
Actinidia18966.t1	Lachesis_group9	4853805	4874041	E+	noTP	none	noTP	788	segmental
Actinidia19062.t1	Lachesis_group9	3826888	3831484	P	mTP	possibly mitochondrial	mTP	846	segmental
Actinidia19140.t1	Lachesis_group8	3837836	3840217	E	noTP	none	noTP	581	segmental
Actinidia19198.t1	Lachesis_group8	3100134	3107627	E	SP	ER	SP	1249	segmental
Actinidia19216.t1	Lachesis_group8	2940416	2945206	E+	noTP	possibly mitochondrial	mTP	684	segmental
Actinidia19361.t1	Lachesis_group1	5429594	5431690	E+	cTP	plastid	cTP	665	segmental
Actinidia19409.t1	Lachesis_group0	6754659	6758012	P	noTP	none	noTP	482	segmental
Actinidia19611.t1	Lachesis_group27	2989645	2991350	P	noTP	none	noTP	528	segmental
Actinidia19612.t1	Lachesis_group27	2993703	2995117	P	noTP	none	noTP	438	tandem
Actinidia19647.t1	Lachesis_group17	8738876	8741676	E+	noTP	plastid	cTP	601	segmental
Actinidia19669.t1	Lachesis_group17	9212147	9218078	P	noTP	none	noTP	535	segmental
Actinidia19705.t1	Lachesis_group17	9844430	9846756	E	noTP	none	noTP	305	segmental
Actinidia19717.t1	Lachesis_group17	10040019	10042216	P	noTP	possibly plastid	cTP	682	segmental
Actinidia19756.t1	Lachesis_group17	10757718	10759701	E	noTP	possibly mitochondrial	mTP	536	segmental
Actinidia19847.t1	Lachesis_group10	9227209	9229152	P	noTP	none	noTP	615	segmental
Actinidia19939.t1	Lachesis_group11	19574796	19577595	E	mTP	possibly mitochondrial	mTP	527	segmental
Actinidia19963.t1	Lachesis_group19	14768098	14771187	DYW	cTP	none	cTP	967	segmental
Actinidia20005.t1	Lachesis_group11	5063753	5065386	E+	noTP	none	noTP	285	segmental
Actinidia20025.t1	Lachesis_group11	5602329	5608519	P	mTP	mitochondrial	mTP	519	segmental
Actinidia20101.t1	Lachesis_group11	7301355	7304171	E	noTP	none	noTP	695	segmental
Actinidia20162.t1	Lachesis_group6	20139638	20141944	P	noTP	none	noTP	546	segmental
Actinidia20225.t1	Lachesis_group6	20937118	20939091	DYW	noTP	possibly ER	noTP	571	segmental
Actinidia20293.t1	Lachesis_group18	13284145	13287217	DYW	noTP	none	noTP	586	segmental
Actinidia20312.t1	Lachesis_group18	13485604	13487989	E	cTP	none	cTP	620	segmental
Actinidia20320.t1	Lachesis_group18	13652448	13654175	E	noTP	none	noTP	552	segmental
Actinidia20373.t1	Lachesis_group18	14268340	14269968	E+	mTP	none	mTP	500	segmental
Actinidia20465.t1	Lachesis_group15	12905154	12906945	P	mTP	none	mTP	401	segmental
Actinidia20495.t1	Lachesis_group25	1195377	1202516	E	noTP	none	noTP	923	segmental
Actinidia20506.t1	Lachesis_group25	1074058	1075793	E+	noTP	none	noTP	268	segmental
Actinidia20530.t1	Lachesis_group25	815770	818184	DYW	noTP	possibly plastid	cTP	716	segmental
Actinidia20534.t1	Lachesis_group25	787991	789790	E	noTP	none	noTP	390	segmental
Actinidia20535.t1	Lachesis_group25	783938	785519	E	noTP	none	noTP	491	segmental
Actinidia20582.t1	Lachesis_group25	244506	246504	E+	noTP	plastid	cTP	625	segmental
Actinidia20592.t1	Lachesis_group25	108280	108647	P	noTP	no terminal Met	noTP	121	segmental
Actinidia20648.t1	Lachesis_group23	15543394	15547983	E	noTP	none	noTP	404	segmental
Actinidia20906.t1	Lachesis_group6	9835467	9837506	E+	noTP	none	noTP	592	segmental
Actinidia20935.t1	Lachesis_group6	10230341	10239832	P	noTP	none	noTP	994	segmental
Actinidia20981.t1	Lachesis_group9	21365159	21369408	P	noTP	none	noTP	514	segmental
Actinidia21102.t1	Lachesis_group9	20295712	20300822	P	cTP	none	cTP	850	segmental
Actinidia21111.t1	Lachesis_group9	20207517	20211404	P	noTP	possibly mitochondrial	mTP	456	segmental
Actinidia21230.t1	Lachesis_group24	12131023	12133054	E	noTP	possibly mitochondrial	mTP	574	segmental
Actinidia21263.t1	Lachesis_group0	20482982	20485010	E	noTP	none	noTP	594	segmental
Actinidia21299.t3	Lachesis_group28	9116455	9124477	P	noTP	none	noTP	494	singleton
Actinidia21376.t1	Lachesis_group19	17965977	17967596	E	noTP	none	noTP	500	segmental
Actinidia21529.t1	Lachesis_group16	12810379	12813419	P	noTP	none	noTP	581	segmental
Actinidia21684.t1	Lachesis_group1	2380531	2384332	DYW	noTP	none	noTP	388	segmental
Actinidia21765.t1	Lachesis_group1	1475080	1477924	E+	noTP	none	noTP	736	segmental
Actinidia21884.t1	Lachesis_group1	331823	335709	P	mTP	mitochondrial	mTP	311	segmental
Actinidia21990.t1	Lachesis_group15	5471509	5473275	E	noTP	possibly ER	noTP	427	segmental
Actinidia22089.t1	Lachesis_group15	4290027	4293921	DYW	noTP	ER	noTP	1078	segmental
Actinidia22278.t1	Lachesis_group23	2173796	2179617	E+	noTP	none	noTP	656	segmental
Actinidia22304.t1	Lachesis_group23	1748681	1749837	E	noTP	none	noTP	350	segmental
Actinidia22313.t1	Lachesis_group23	1612882	1616674	E	noTP	none	noTP	517	segmental
Actinidia22395.t1	Lachesis_group23	622977	632266	P	mTP	mitochondrial	mTP	710	segmental
Actinidia22399.t2	Lachesis_group23	581000	596922	P	noTP	possibly mitochondrial	mTP	633	singleton
Actinidia22483.t1	Lachesis_group2	15613236	15616795	E	mTP	possibly mitochondrial	mTP	677	segmental
Actinidia22509.t1	Lachesis_group28	2103511	2104718	E+	noTP	none	noTP	283	segmental
Actinidia22918.t1	Lachesis_group26	16282550	16285567	P	noTP	mitochondrial	mTP	469	segmental
Actinidia23019.t1	Lachesis_group28	10993247	10996550	P	noTP	possibly mitochondrial	mTP	808	segmental
Actinidia23109.t1	Lachesis_group27	9985617	9989934	P	cTP	plastid	cTP	1110	segmental
Actinidia23301.t1	Lachesis_group28	13121997	13124083	E+	cTP	possibly plastid	cTP	656	segmental
Actinidia23380.t1	Lachesis_group20	13760583	13763041	P	noTP	none	noTP	670	segmental
Actinidia23519.t1	Lachesis_group3	2133859	2136400	E+	luTP	plastid	luTP	727	segmental
Actinidia23531.t1	Lachesis_group3	2249903	2250945	P	noTP	none	noTP	216	segmental
Actinidia23726.t1	Lachesis_group9	18779286	18785035	E	cTP	none	cTP	959	segmental
Actinidia23773.t1	Lachesis_group9	18432284	18433419	P	mTP	possibly mitochondrial	mTP	337	segmental
Actinidia23849.t1	Lachesis_group9	17705561	17710806	E+	noTP	ER	noTP	679	segmental
Actinidia23933.t1	Lachesis_group9	16863909	16875182	E	noTP	possibly plastid	cTP	963	segmental
Actinidia23941.t1	Lachesis_group9	16785400	16788817	P	mTP	mitochondrial	mTP	532	segmental
Actinidia24041.t2	Lachesis_group10	8309940	8317047	P	mTP	mitochondrial	mTP	825	singleton
Actinidia24081.t1	Lachesis_group24	4227002	4231297	P	noTP	possibly ER	noTP	517	segmental
Actinidia24203.t1	Lachesis_group24	5734857	5736926	DYW	noTP	none	noTP	313	segmental
Actinidia24301.t1	Lachesis_group24	14623140	14629684	P	noTP	possibly mitochondrial	mTP	497	segmental
Actinidia24327.t1	Lachesis_group24	15020849	15022470	E+	noTP	none	noTP	497	segmental
Actinidia24374.t1	Lachesis_group1	13047547	13051599	DYW	noTP	possibly mitochondrial	mTP	742	segmental
Actinidia24389.t1	Lachesis_group18	10232103	10234379	DYW	mTP	mitochondrial	mTP	600	segmental
Actinidia24407.t1	Lachesis_group19	1444386	1446382	DYW	mTP	none	mTP	616	segmental
Actinidia24456.t1	Lachesis_group24	2414879	2417576	P	mTP	mitochondrial	mTP	603	segmental
Actinidia24491.t1	Lachesis_group24	2917830	2920479	P	noTP	none	noTP	836	segmental
Actinidia24662.t1	Lachesis_group10	19758523	19761016	P	noTP	none	noTP	598	segmental
Actinidia24889.t1	Lachesis_group15	18578495	18583492	P	noTP	none	noTP	405	dispersed
Actinidia25020.t1	Lachesis_group22	3620672	3623173	E	mTP	none	mTP	425	segmental
Actinidia25143.t1	Lachesis_group20	16478111	16481032	P	noTP	none	noTP	683	dispersed
Actinidia25367.t1	Contig01250	1178	2832	P	mTP	plastid	mTP	497	dispersed
Actinidia25436.t1	Lachesis_group1	3353890	3355058	P	noTP	none	noTP	332	segmental
Actinidia25477.t1	Lachesis_group1	3609544	3613046	P	mTP	mitochondrial	mTP	564	segmental
Actinidia25528.t1	Lachesis_group1	4197729	4200457	P	noTP	none	noTP	846	segmental
Actinidia25674.t1	Contig01303	3506	4846	E+	noTP	none	noTP	381	dispersed
Actinidia25755.t1	Lachesis_group16	2022838	2026706	P	noTP	none	noTP	269	segmental
Actinidia25862.t1	Lachesis_group15	19866764	19871954	P	noTP	plastid	cTP	850	segmental
Actinidia25867.t1	Lachesis_group15	19926979	19929413	P	mTP	plastid	mTP	510	proximal
Actinidia25897.t1	Lachesis_group22	2306031	2307739	DYW	noTP	plastid	cTP	538	segmental
Actinidia26119.t1	Lachesis_group25	13018	13610	P	noTP	no terminal Met	noTP	196	segmental
Actinidia26149.t1	Lachesis_group7	20377722	20380348	P	noTP	none	noTP	149	segmental
Actinidia26187.t1	Lachesis_group7	20791960	20811700	E+	noTP	none	noTP	1871	segmental
Actinidia26189.t1	Lachesis_group7	20847460	20866305	P	mTP	mitochondrial	mTP	1185	segmental
Actinidia26891.t1	Lachesis_group0	974982	978367	E+	noTP	none	noTP	734	segmental
Actinidia26936.t1	Lachesis_group0	1395622	1396495	P	noTP	none	noTP	202	dispersed
Actinidia27070.t1	Contig01474	24927	25958	P	noTP	none	noTP	290	dispersed
Actinidia27141.t1	Contig01487	11756	15383	E	noTP	none	noTP	623	dispersed
Actinidia27494.t1	Lachesis_group0	19895737	19897541	DYW	noTP	possibly mitochondrial	mTP	549	segmental
Actinidia27542.t1	Contig01577	29043	32115	E+	noTP	none	noTP	613	dispersed
Actinidia27553.t1	Lachesis_group23	10925935	10928483	E	noTP	none	noTP	768	segmental
Actinidia28084.t1	Lachesis_group16	16381569	16385148	P	noTP	none	noTP	425	segmental
Actinidia28087.t1	Lachesis_group16	16367952	16371952	P	noTP	none	noTP	597	segmental
Actinidia28102.t1	Lachesis_group16	16157440	16159806	E	noTP	none	noTP	509	segmental
Actinidia28199.t1	Contig01708	1403	10872	E	SP	none	SP	882	dispersed
Actinidia28258.t1	Contig01728	9030	10358	P	noTP	none	noTP	355	dispersed
Actinidia28357.t1	Lachesis_group23	4391079	4395291	E+	noTP	none	noTP	827	segmental
Actinidia28434.t1	Lachesis_group16	7804562	7814603	E	noTP	possibly mitochondrial	mTP	746	segmental
Actinidia28812.t1	Lachesis_group8	1374596	1376523	P	noTP	none	noTP	462	segmental
Actinidia29032.t1	Lachesis_group3	19009288	19012156	P	noTP	none	noTP	523	segmental
Actinidia29389.t2	Lachesis_group7	8180399	8186194	P	noTP	plastid	cTP	359	singleton
Actinidia29423.t1	Lachesis_group7	7504423	7514963	E	noTP	none	noTP	1155	segmental
Actinidia29499.t1	Lachesis_group7	5807856	5809886	E+	noTP	possibly mitochondrial	mTP	600	segmental
Actinidia29511.t1	Lachesis_group7	5588483	5590894	E+	noTP	none	noTP	478	segmental
Actinidia29740.t1	Lachesis_group22	4836653	4846174	E+	noTP	none	noTP	767	segmental
Actinidia29766.t1	Lachesis_group27	677803	680297	P	noTP	none	noTP	381	segmental
Actinidia29998.t1	Lachesis_group24	8325434	8328626	E+	noTP	plastid	cTP	650	segmental
Actinidia30061.t1	Lachesis_group24	7702811	7707240	DYW	noTP	none	noTP	710	segmental
Actinidia30218.t1	Lachesis_group18	16288552	16292109	E+	noTP	none	noTP	690	segmental
Actinidia30329.t1	Lachesis_group14	7506916	7508012	P	noTP	none	noTP	331	segmental
Actinidia30486.t1	Lachesis_group15	16002724	16004817	E+	noTP	ER	noTP	398	segmental
Actinidia30489.t1	Lachesis_group15	15974988	15978572	P	noTP	possibly mitochondrial	mTP	435	segmental
Actinidia30559.t1	Lachesis_group10	2325810	2327834	DYW	noTP	possibly mitochondrial	mTP	435	segmental
Actinidia30600.t1	Lachesis_group10	2847110	2848993	E+	mTP	possibly mitochondrial	mTP	563	segmental
Actinidia30813.t1	Lachesis_group28	5449576	5452730	P	noTP	possibly mitochondrial	mTP	513	segmental
Actinidia31096.t1	Lachesis_group17	17911165	17913546	E+	noTP	none	noTP	529	segmental
Actinidia31188.t1	Lachesis_group12	16222290	16226990	E+	noTP	none	noTP	565	segmental
Actinidia31220.t1	Lachesis_group14	8875828	8881975	P	noTP	none	noTP	621	segmental
Actinidia31302.t1	Lachesis_group20	8866131	8869245	DYW	mTP	mitochondrial	mTP	771	segmental
Actinidia31333.t1	Lachesis_group20	9333732	9334469	P	noTP	none	noTP	210	segmental
Actinidia31341.t1	Lachesis_group20	9393585	9395840	E	noTP	none	noTP	681	segmental
Actinidia31372.t1	Lachesis_group17	17456410	17458071	E+	mTP	mitochondrial	mTP	512	segmental
Actinidia31473.t1	Lachesis_group20	13101327	13104242	E	noTP	possibly mitochondrial	mTP	675	segmental
Actinidia31525.t1	Lachesis_group19	10108125	10112626	P	noTP	none	noTP	602	segmental
Actinidia31566.t1	Lachesis_group17	1248282	1249653	P	noTP	none	noTP	211	segmental
Actinidia31796.t1	Lachesis_group21	16648126	16662881	E+	noTP	none	noTP	1647	segmental
Actinidia31803.t1	Lachesis_group21	16744105	16746016	E+	mTP	none	mTP	562	segmental
Actinidia31923.t1	Lachesis_group15	1651466	1658209	P	mTP	mitochondrial	mTP	637	segmental
Actinidia31949.t1	Lachesis_group15	1467676	1470427	E	mTP	possibly mitochondrial	mTP	710	tandem
Actinidia31950.t1	Lachesis_group15	1458172	1466166	E+	noTP	none	noTP	1689	segmental
Actinidia31980.t1	Lachesis_group15	1250052	1250958	P	noTP	none	noTP	245	segmental
Actinidia32089.t1	Lachesis_group23	15781764	15801054	P	cTP	plastid	cTP	1112	segmental
Actinidia32109.t1	Lachesis_group27	13787503	13797831	P	noTP	none	noTP	511	segmental
Actinidia32551.t1	Lachesis_group8	19021267	19022862	P	noTP	none	noTP	410	segmental
Actinidia32661.t1	Lachesis_group25	15769241	15771860	DYW	noTP	none	noTP	719	segmental
Actinidia32677.t1	Lachesis_group25	15562932	15573476	P	noTP	none	noTP	742	segmental
Actinidia32678.t1	Lachesis_group25	15555435	15559188	P	noTP	none	noTP	575	segmental
Actinidia32727.t1	Lachesis_group27	13278362	13281049	DYW	mTP	possibly mitochondrial	mTP	663	segmental
Actinidia32795.t1	Lachesis_group14	7306217	7308533	P	noTP	possibly plastid	cTP	493	segmental
Actinidia32859.t1	Lachesis_group22	2618012	2623811	P	mTP	possibly mitochondrial	mTP	378	segmental
Actinidia32984.t1	Contig02004_ERROPOS100000	2094	3167	P	mTP	possibly mitochondrial	mTP	250	dispersed
Actinidia33047.t1	Lachesis_group13	8424189	8431443	E+	noTP	none	noTP	696	segmental
Actinidia33264.t1	Lachesis_group12	18869834	18874610	P	noTP	none	noTP	463	segmental
Actinidia33408.t1	Lachesis_group10	7537027	7539895	P	mTP	mitochondrial	mTP	558	segmental
Actinidia33437.t1	Lachesis_group16	15000771	15005467	DYW	noTP	none	noTP	796	segmental
Actinidia33505.t1	Lachesis_group16	14172327	14175198	E+	noTP	none	noTP	211	segmental
Actinidia33592.t1	Lachesis_group23	14483470	14488459	DYW	noTP	none	noTP	934	tandem
Actinidia33593.t1	Lachesis_group23	14462724	14467558	E	noTP	none	noTP	599	segmental
Actinidia33650.t1	Lachesis_group2	24227726	24231165	DYW	noTP	none	noTP	833	segmental
Actinidia33659.t1	Lachesis_group2	23458279	23461965	E+	noTP	none	noTP	799	segmental
Actinidia33697.t1	Lachesis_group2	21536962	21540067	E+	noTP	none	noTP	860	segmental
Actinidia33760.t2	Lachesis_group20	17800329	17803622	P	noTP	plastid	cTP	668	singleton
Actinidia33773.t1	Lachesis_group20	17571488	17573050	E+	noTP	none	noTP	494	segmental
Actinidia33834.t1	Lachesis_group7	19490149	19493721	DYW	noTP	possibly mitochondrial	mTP	819	segmental
Actinidia34037.t3	Lachesis_group10	5157515	5160586	P	noTP	possibly ER	noTP	404	singleton
Actinidia34114.t1	Lachesis_group3	15116542	15120870	P	noTP	none	noTP	294	segmental
Actinidia34179.t1	Lachesis_group3	15822037	15824472	DYW	noTP	possibly mitochondrial	mTP	686	segmental
Actinidia34201.t1	Lachesis_group3	15984471	15990947	E	mTP	mitochondrial	mTP	767	segmental
Actinidia34295.t3	Lachesis_group3	16928969	16935644	P	noTP	plastid	cTP	1464	singleton
Actinidia34380.t1	Lachesis_group2	17189385	17191819	P	noTP	none	noTP	726	segmental
Actinidia34388.t1	Lachesis_group2	17078111	17079964	E+	noTP	plastid	cTP	585	segmental
Actinidia34412.t1	Lachesis_group15	11090763	11092429	E	noTP	none	noTP	525	segmental
Actinidia34431.t1	Lachesis_group15	10817482	10825163	DYW	noTP	possibly plastid	cTP	911	segmental
Actinidia34496.t1	Lachesis_group15	10024726	10027579	P	mTP	none	mTP	410	segmental
Actinidia34673.t1	Lachesis_group1	24610367	24613718	E+	noTP	mitochondrial	mTP	630	segmental
Actinidia34693.t1	Lachesis_group6	1827290	1833049	P	mTP	mitochondrial	mTP	654	segmental
Actinidia34714.t1	Lachesis_group6	1595966	1597955	E+	noTP	none	noTP	452	segmental
Actinidia34749.t1	Lachesis_group6	1143154	1146090	P	noTP	plastid	cTP	772	segmental
Actinidia34755.t1	Lachesis_group6	1094642	1097427	P	noTP	none	noTP	521	segmental
Actinidia34976.t1	Lachesis_group2	3540148	3543253	P	mTP	mitochondrial	mTP	895	segmental
Actinidia34995.t1	Lachesis_group2	3727479	3731935	E+	noTP	none	noTP	778	segmental
Actinidia35010.t1	Lachesis_group2	3864556	3868025	E+	noTP	none	noTP	552	segmental
Actinidia35012.t1	Lachesis_group2	3879842	3885630	P	mTP	mitochondrial	mTP	489	segmental
Actinidia35047.t1	Lachesis_group2	4286705	4289667	P	SP	ER	SP	689	segmental
Actinidia35058.t1	Lachesis_group2	4463120	4465765	E+	noTP	none	noTP	853	segmental
Actinidia35116.t1	Lachesis_group2	5166719	5167646	E	noTP	possibly mitochondrial	mTP	257	segmental
Actinidia35151.t1	Lachesis_group2	5570918	5576695	E+	noTP	none	noTP	447	segmental
Actinidia35252.t1	Lachesis_group2	6676164	6695485	P	cTP	plastid	cTP	820	segmental
Actinidia35406.t1	Lachesis_group2	8280670	8284248	P	noTP	none	noTP	1090	segmental
Actinidia35478.t1	Lachesis_group2	9163285	9164849	E+	cTP	possibly plastid	cTP	483	segmental
Actinidia35523.t1	Lachesis_group2	9721732	9723573	P	mTP	possibly mitochondrial	mTP	588	segmental
Actinidia35565.t1	Lachesis_group2	10293457	10296584	P	noTP	none	noTP	973	segmental
Actinidia35699.t1	Lachesis_group25	6310201	6314276	E+	noTP	mitochondrial	noTP	539	segmental
Actinidia35774.t1	Lachesis_group21	1475716	1477265	DYW	noTP	none	noTP	489	segmental
Actinidia35825.t1	Lachesis_group8	18221214	18223387	DYW	noTP	none	noTP	583	segmental
Actinidia35848.t1	Lachesis_group8	17815841	17816977	DYW	noTP	none	noTP	222	segmental
Actinidia35910.t1	Lachesis_group8	16461472	16466460	P	mTP	mitochondrial	mTP	649	segmental
Actinidia35937.t1	Lachesis_group8	15953115	15955829	E	noTP	none	noTP	564	segmental
Actinidia36037.t1	Lachesis_group4	2240543	2242994	P	cTP	plastid	cTP	673	segmental
Actinidia36102.t1	Lachesis_group4	1496440	1497464	E	noTP	none	noTP	316	segmental
Actinidia36147.t1	Lachesis_group4	1056251	1058757	P	noTP	none	noTP	682	segmental
Actinidia36218.t1	Lachesis_group4	380816	388178	P	noTP	possibly plastid	cTP	634	segmental
Actinidia36242.t1	Lachesis_group4	159966	163636	DYW	noTP	none	noTP	755	tandem
Actinidia36243.t1	Lachesis_group4	155871	159734	DYW	noTP	none	noTP	876	segmental
Actinidia36281.t1	Lachesis_group4	3489410	3494030	E+	noTP	none	noTP	819	segmental
Actinidia36290.t1	Lachesis_group4	3589493	3591442	P	mTP	mitochondrial	mTP	631	segmental
Actinidia36415.t1	Lachesis_group4	5020490	5022833	E+	mTP	possibly mitochondrial	mTP	610	segmental
Actinidia36452.t1	Lachesis_group4	5487945	5490309	E+	noTP	none	noTP	304	segmental
Actinidia36496.t1	Lachesis_group4	6112609	6115863	E+	mTP	mitochondrial	mTP	1040	segmental
Actinidia36510.t1	Lachesis_group4	6413292	6415519	E	mTP	possibly mitochondrial	mTP	691	segmental
Actinidia36711.t1	Contig02097	53848	59259	P	noTP	possibly mitochondrial	mTP	282	proximal
Actinidia36802.t1	Lachesis_group9	2610838	2612750	DYW	noTP	none	noTP	608	segmental
Actinidia36912.t1	Lachesis_group24	12104422	12105488	E	noTP	none	noTP	224	segmental
Actinidia36956.t1	Lachesis_group10	17416893	17420158	DYW	noTP	plastid	cTP	684	segmental
Actinidia37309.t1	Contig02164	47128	48385	P	SP	ER	SP	254	dispersed
Actinidia37413.t1	Lachesis_group16	3182267	3193418	P	noTP	mitochondrial	mTP	445	segmental
Actinidia37613.t1	Lachesis_group13	7419433	7420818	E+	noTP	none	noTP	359	segmental
Actinidia37616.t1	Lachesis_group13	7462209	7465838	E+	noTP	none	noTP	569	segmental
Actinidia37630.t1	Lachesis_group13	7639286	7645641	E	noTP	possibly plastid	cTP	529	segmental
Actinidia37632.t1	Lachesis_group13	7654707	7656607	P	noTP	none	noTP	420	segmental
Actinidia37684.t1	Lachesis_group13	8227951	8233445	P	noTP	none	noTP	383	segmental
Actinidia37703.t1	Lachesis_group21	16076	18681	E+	noTP	none	noTP	429	dispersed
Actinidia37914.t1	Lachesis_group7	1083186	1085422	P	mTP	mitochondrial	mTP	573	segmental
Actinidia37949.t1	Lachesis_group7	1436689	1438804	P	noTP	none	noTP	378	segmental
Actinidia38146.t1	Lachesis_group3	6479828	6485115	E+	noTP	none	noTP	819	segmental
Actinidia38240.t1	Lachesis_group3	8129718	8131346	E	noTP	none	noTP	147	segmental
Actinidia38410.t1	Lachesis_group15	364805	370038	P	noTP	possibly plastid	cTP	786	segmental
Actinidia38544.t1	Lachesis_group8	5135337	5138547	P	noTP	none	noTP	418	segmental
Actinidia38764.t1	Lachesis_group4	2851537	2853501	DYW	noTP	none	noTP	613	segmental
Actinidia38782.t1	Contig02207_ERROPOS181165X	37302	39275	DYW	noTP	none	noTP	616	segmental
Actinidia38807.t1	Lachesis_group27	15799751	15805538	P	mTP	possibly mitochondrial	mTP	843	segmental
Actinidia39218.t1	Lachesis_group18	12654681	12663462	P	noTP	none	noTP	855	segmental
Actinidia39289.t1	Lachesis_group9	11928061	11930880	E	mTP	possibly mitochondrial	mTP	579	segmental
Actinidia39302.t1	Lachesis_group9	11634601	11636420	DYW	noTP	none	noTP	576	segmental
Actinidia39312.t1	Lachesis_group9	11485024	11488720	P	mTP	mitochondrial	mTP	499	segmental
Actinidia39525.t1	Lachesis_group17	16320964	16323576	E	cTP	plastid	cTP	538	segmental
Actinidia39730.t1	Lachesis_group5	20439316	20442382	DYW	mTP	ER	mTP	877	segmental
Actinidia39878.t1	Lachesis_group17	12688373	12691399	P	noTP	none	noTP	693	segmental
Actinidia39890.t1	Lachesis_group17	12832083	12834011	E+	noTP	none	noTP	467	segmental
Actinidia39996.t1	Lachesis_group22	11810162	11825102	P	noTP	none	noTP	584	segmental
Actinidia40095.t1	Lachesis_group22	13954013	13955934	E+	mTP	none	mTP	600	segmental
Actinidia40130.t1	Lachesis_group22	14596159	14598265	P	noTP	none	noTP	444	segmental
Actinidia40254.t1	Lachesis_group22	16306921	16310515	DYW	mTP	possibly mitochondrial	mTP	717	segmental
Actinidia40273.t1	Lachesis_group22	16539918	16544245	P	mTP	possibly mitochondrial	mTP	890	segmental
Actinidia40353.t1	Lachesis_group22	17256160	17258319	P	noTP	none	noTP	690	segmental
								1871
								91

## Sheet: S2
Table S2. Detailed information for PPR genes in the Actinidia eriantha genome.
Gene ID	Chromosome	Position		Accession V2	subfamily	TargetP Prediction	Predotar Prediction	subcellular localization	Length of Amino acid
DTZ79_00g03220	Chr00	5826861	5828158	DTZ79_00g03220	E	mTP	possibly mitochondrial	mTP	396
DTZ79_01g00570	Chr01	614733	616317	DTZ79_01g00570	P	noTP	ER	noTP	475
DTZ79_01g01300	Chr01	1509576	1515586	DTZ79_01g01300	DYW	noTP	possibly ER	noTP	982
DTZ79_01g01730	Chr01	2136014	2137783	DTZ79_01g01730	E+	noTP	none	noTP	532
DTZ79_01g01760	Chr01	2195705	2197687	DTZ79_01g01760	E+	noTP	none	noTP	240
DTZ79_01g04450	Chr01	6562896	6566318	DTZ79_01g04450	DYW	noTP	none	noTP	710
DTZ79_01g07050	Chr01	12635841	12644666	DTZ79_01g07050	P	noTP	possibly mitochondrial	mTP	349
DTZ79_01g08230	Chr01	14638155	14639513	DTZ79_01g08230	E+	mTP	none	mTP	452
DTZ79_01g10780	Chr01	18429479	18431484	DTZ79_01g10780	E	noTP	mitochondrial	mTP	639
DTZ79_01g11220	Chr01	19075975	19082753	DTZ79_01g11220	E+	mTP	mitochondrial	mTP	1174
DTZ79_01g11360	Chr01	19236317	19242401	DTZ79_01g11360	E	noTP	possibly mitochondrial	mTP	729
DTZ79_01g11720	Chr01	19654735	19662014	DTZ79_01g11720	P	noTP	none	noTP	590
DTZ79_01g14010	Chr01	22391301	22392277	DTZ79_01g14010	P	mTP	mitochondrial	mTP	266
DTZ79_02g00820	Chr02	660311	662875	DTZ79_02g00820	E+	noTP	possibly ER	noTP	854
DTZ79_02g02370	Chr02	1932472	1934304	DTZ79_02g02370	E	noTP	plastid	cTP	610
DTZ79_02g02430	Chr02	1997564	2000102	DTZ79_02g02430	P	luTP	none	luTP	376
DTZ79_02g02580	Chr02	2129995	2132999	DTZ79_02g02580	P	noTP	none	noTP	987
DTZ79_02g07610	Chr02	7568383	7569361	DTZ79_02g07610	E+	noTP	none	noTP	294
DTZ79_02g09020	Chr02	9582668	9583098	DTZ79_02g09020	P	noTP	possibly mitochondrial	mTP	129
DTZ79_02g09030	Chr02	9583274	9583726	DTZ79_02g09030	P	noTP	none	noTP	148
DTZ79_02g09230	Chr02	9801130	9814382	DTZ79_02g09230	P	noTP	none	noTP	1020
DTZ79_02g10500	Chr02	13479922	13480721	DTZ79_02g10500	P	cTP	possibly ER	cTP	146
DTZ79_02g11890	Chr02	15762643	15764076	DTZ79_02g11890	E	noTP	none	noTP	477
DTZ79_02g14070	Chr02	18685293	18686543	DTZ79_02g14070	E+	noTP	plastid	cTP	416
DTZ79_02g14500	Chr02	19298759	19300591	DTZ79_02g14500	E	noTP	none	noTP	610
DTZ79_03g00320	Chr03	503155	511673	DTZ79_03g00320	P	mTP	mitochondrial	mTP	900
DTZ79_03g05810	Chr03	5940479	5943284	DTZ79_03g05810	P	noTP	possibly mitochondrial	mTP	647
DTZ79_03g08000	Chr03	8238698	8245404	DTZ79_03g08000	P	noTP	none	noTP	1472
DTZ79_03g09380	Chr03	9636968	9638986	DTZ79_03g09380	DYW	noTP	none	noTP	672
DTZ79_03g13480	Chr03	15671560	15673816	DTZ79_03g13480	DYW	mTP	possibly mitochondrial	mTP	595
DTZ79_03g14440	Chr03	17474889	17476418	DTZ79_03g14440	P	noTP	none	noTP	505
DTZ79_03g15490	Chr03	19553871	19556272	DTZ79_03g15490	P	noTP	none	noTP	648
DTZ79_03g17800	Chr03	22845608	22848473	DTZ79_03g17800	E	noTP	none	noTP	585
DTZ79_03g18210	Chr03	23581868	23592970	DTZ79_03g18210	P	noTP	none	noTP	1317
DTZ79_03g18530	Chr03	24151368	24167773	DTZ79_03g18530	P	mTP	mitochondrial	mTP	761
DTZ79_03g18870	Chr03	24751136	24752127	DTZ79_03g18870	P	mTP	mitochondrial	mTP	296
DTZ79_03g19000	Chr03	24883140	24885618	DTZ79_03g19000	E	noTP	none	noTP	738
DTZ79_04g00490	Chr04	444989	449170	DTZ79_04g00490	E+	noTP	none	noTP	646
DTZ79_04g01210	Chr04	1139890	1140352	DTZ79_04g01210	DYW	noTP	none	noTP	147
DTZ79_04g02410	Chr04	2484355	2486977	DTZ79_04g02410	P	mTP	mitochondrial	mTP	416
DTZ79_04g03050	Chr04	3153324	3155742	DTZ79_04g03050	DYW	noTP	none	noTP	482
DTZ79_04g05220	Chr04	5762681	5764222	DTZ79_04g05220	P	noTP	none	noTP	473
DTZ79_04g06030	Chr04	6948436	6950298	DTZ79_04g06030	DYW	noTP	no terminal Met	noTP	620
DTZ79_04g06960	Chr04	8640025	8642419	DTZ79_04g06960	E+	mTP	possibly mitochondrial	mTP	711
DTZ79_04g07940	Chr04	10425128	10430980	DTZ79_04g07940	P	noTP	mitochondrial	mTP	471
DTZ79_04g08970	Chr04	12761016	12771379	DTZ79_04g08970	P	mTP	no terminal Met	mTP	777
DTZ79_04g09460	Chr04	15297847	15298782	DTZ79_04g09460	DYW	cTP	none	cTP	311
DTZ79_04g09470	Chr04	15298875	15299618	DTZ79_04g09470	DYW	noTP	none	noTP	238
DTZ79_05g00690	Chr05	1008391	1009986	DTZ79_05g00690	E	noTP	none	noTP	531
DTZ79_05g00930	Chr05	1343311	1343971	DTZ79_05g00930	P	noTP	plastid	cTP	190
DTZ79_05g01410	Chr05	1948454	1956254	DTZ79_05g01410	P	noTP	none	noTP	495
DTZ79_05g01430	Chr05	1980886	1982427	DTZ79_05g01430	P	noTP	possibly plastid	cTP	513
DTZ79_05g02160	Chr05	3486974	3488915	DTZ79_05g02160	DYW	noTP	mitochondrial	mTP	621
DTZ79_05g03540	Chr05	6385014	6395408	DTZ79_05g03540	E+	noTP	none	noTP	689
DTZ79_05g04580	Chr05	9832724	9834700	DTZ79_05g04580	E+	mTP	mitochondrial	mTP	658
DTZ79_05g04780	Chr05	10409981	10418102	DTZ79_05g04780	P	noTP	none	noTP	488
DTZ79_05g05830	Chr05	13120598	13125728	DTZ79_05g05830	E+	noTP	none	noTP	651
DTZ79_05g06780	Chr05	14514269	14516774	DTZ79_05g06780	E	noTP	possibly mitochondrial	mTP	630
DTZ79_05g07220	Chr05	15120043	15124886	DTZ79_05g07220	E+	cTP	none	cTP	538
DTZ79_05g07330	Chr05	15245394	15246817	DTZ79_05g07330	E+	mTP	possibly mitochondrial	mTP	356
DTZ79_05g08440	Chr05	16932903	16940682	DTZ79_05g08440	P	noTP	none	noTP	631
DTZ79_05g09900	Chr05	18882548	18895590	DTZ79_05g09900	P	noTP	none	noTP	927
DTZ79_05g10860	Chr05	20210721	20214017	DTZ79_05g10860	E+	cTP	plastid	cTP	734
DTZ79_05g11430	Chr05	21167103	21168775	DTZ79_05g11430	E+	noTP	none	noTP	510
DTZ79_06g01000	Chr06	1178564	1182579	DTZ79_06g01000	P	noTP	possibly mitochondrial	mTP	467
DTZ79_06g01350	Chr06	1552988	1559005	DTZ79_06g01350	P	noTP	none	noTP	515
DTZ79_06g02070	Chr06	2426407	2440826	DTZ79_06g02070	P	noTP	none	noTP	436
DTZ79_06g02340	Chr06	2767554	2773216	DTZ79_06g02340	DYW	noTP	plastid	cTP	1089
DTZ79_06g03620	Chr06	4388603	4390303	DTZ79_06g03620	E	noTP	mitochondrial	mTP	566
DTZ79_06g03720	Chr06	4525659	4527754	DTZ79_06g03720	E	mTP	mitochondrial	mTP	614
DTZ79_06g04510	Chr06	5657600	5658296	DTZ79_06g04510	P	mTP	possibly mitochondrial	mTP	208
DTZ79_06g05020	Chr06	6684387	6686264	DTZ79_06g05020	E	noTP	none	noTP	625
DTZ79_06g05120	Chr06	6887332	6890090	DTZ79_06g05120	P	noTP	possibly mitochondrial	mTP	419
DTZ79_06g05170	Chr06	6923390	6927251	DTZ79_06g05170	DYW	noTP	possibly mitochondrial	mTP	742
DTZ79_06g05190	Chr06	6952542	6957044	DTZ79_06g05190	P	noTP	possibly mitochondrial	mTP	463
DTZ79_06g05310	Chr06	7224067	7225735	DTZ79_06g05310	P	noTP	none	noTP	217
DTZ79_06g05440	Chr06	7830951	7832690	DTZ79_06g05440	E+	noTP	none	noTP	470
DTZ79_06g05590	Chr06	8311622	8314880	DTZ79_06g05590	P	noTP	none	noTP	553
DTZ79_06g05630	Chr06	8347025	8348669	DTZ79_06g05630	P	noTP	none	noTP	475
DTZ79_06g06020	Chr06	9690190	9694714	DTZ79_06g06020	DYW	noTP	none	noTP	728
DTZ79_06g06460	Chr06	10896597	10898768	DTZ79_06g06460	E+	noTP	none	noTP	443
DTZ79_06g07760	Chr06	13327088	13331685	DTZ79_06g07760	P	noTP	none	noTP	475
DTZ79_06g07930	Chr06	13552766	13563886	DTZ79_06g07930	E	noTP	none	noTP	1168
DTZ79_06g08120	Chr06	13782177	13783278	DTZ79_06g08120	E+	noTP	plastid	cTP	297
DTZ79_06g08940	Chr06	15263504	15268318	DTZ79_06g08940	P	noTP	none	noTP	252
DTZ79_06g09940	Chr06	16797477	16803995	DTZ79_06g09940	P	noTP	none	noTP	251
DTZ79_06g10130	Chr06	17011718	17013595	DTZ79_06g10130	E	noTP	none	noTP	625
DTZ79_06g11540	Chr06	18631006	18632151	DTZ79_06g11540	P	noTP	none	noTP	332
DTZ79_06g13860	Chr06	21112706	21114526	DTZ79_06g13860	E+	noTP	none	noTP	606
DTZ79_06g14280	Chr06	21616937	21621076	DTZ79_06g14280	P	noTP	none	noTP	587
DTZ79_06g14290	Chr06	21621102	21621690	DTZ79_06g14290	P	noTP	none	noTP	185
DTZ79_06g14300	Chr06	21622094	21626718	DTZ79_06g14300	P	noTP	none	noTP	452
DTZ79_06g14960	Chr06	22504571	22506673	DTZ79_06g14960	E	noTP	none	noTP	616
DTZ79_06g15080	Chr06	22669261	22671246	DTZ79_06g15080	E+	noTP	possibly mitochondrial	mTP	661
DTZ79_07g01000	Chr07	1119498	1122328	DTZ79_07g01000	P	noTP	none	noTP	492
DTZ79_07g03520	Chr07	3635448	3639138	DTZ79_07g03520	P	noTP	none	noTP	457
DTZ79_07g03550	Chr07	3648924	3652556	DTZ79_07g03550	P	mTP	none	mTP	540
DTZ79_07g03710	Chr07	3857649	3859448	DTZ79_07g03710	E	noTP	none	noTP	469
DTZ79_07g04080	Chr07	4252345	4256302	DTZ79_07g04080	E	noTP	none	noTP	634
DTZ79_07g05560	Chr07	5980890	5982680	DTZ79_07g05560	E	cTP	plastid	cTP	596
DTZ79_07g06740	Chr07	7399393	7403228	DTZ79_07g06740	P	noTP	none	noTP	772
DTZ79_07g08260	Chr07	9308762	9318804	DTZ79_07g08260	P	noTP	none	noTP	669
DTZ79_07g08630	Chr07	9855381	9857174	DTZ79_07g08630	P	cTP	none	cTP	597
DTZ79_07g09400	Chr07	11285457	11287781	DTZ79_07g09400	E+	mTP	mitochondrial	mTP	774
DTZ79_07g10560	Chr07	14590387	14592624	DTZ79_07g10560	E+	luTP	none	luTP	745
DTZ79_07g12070	Chr07	20025091	20029665	DTZ79_07g12070	P	noTP	none	noTP	214
DTZ79_08g00280	Chr08	406772	408077	DTZ79_08g00280	P	noTP	none	noTP	406
DTZ79_08g01530	Chr08	2067490	2068228	DTZ79_08g01530	E	noTP	no terminal Met	noTP	218
DTZ79_08g01970	Chr08	2639632	2642537	DTZ79_08g01970	P	mTP	mitochondrial	mTP	556
DTZ79_08g02310	Chr08	3094701	3098684	DTZ79_08g02310	E	noTP	possibly mitochondrial	mTP	558
DTZ79_08g02460	Chr08	3323881	3332176	DTZ79_08g02460	P	noTP	none	noTP	315
DTZ79_08g04950	Chr08	7102521	7106726	DTZ79_08g04950	E+	noTP	none	noTP	553
DTZ79_08g05160	Chr08	7582374	7585495	DTZ79_08g05160	E+	noTP	none	noTP	586
DTZ79_08g14590	Chr08	25008516	25010483	DTZ79_08g14590	E	noTP	none	noTP	655
DTZ79_08g14680	Chr08	25098444	25105967	DTZ79_08g14680	P	noTP	none	noTP	554
DTZ79_08g15390	Chr08	26008314	26010071	DTZ79_08g15390	E	mTP	mitochondrial	mTP	585
DTZ79_08g16050	Chr08	27005578	27010016	DTZ79_08g16050	P	noTP	none	noTP	666
DTZ79_08g16430	Chr08	27427320	27429335	DTZ79_08g16430	P	noTP	plastid	cTP	671
DTZ79_09g01160	Chr09	1281937	1283208	DTZ79_09g01160	DYW	noTP	possibly plastid	cTP	423
DTZ79_09g01470	Chr09	1577794	1580980	DTZ79_09g01470	E	noTP	possibly plastid	cTP	729
DTZ79_09g01640	Chr09	1765962	1779615	DTZ79_09g01640	P	noTP	none	noTP	651
DTZ79_09g04590	Chr09	5262676	5265021	DTZ79_09g04590	P	noTP	none	noTP	781
DTZ79_09g05850	Chr09	7254282	7255496	DTZ79_09g05850	DYW	mTP	mitochondrial	mTP	404
DTZ79_09g09320	Chr09	13728754	13735845	DTZ79_09g09320	E	noTP	plastid	cTP	766
DTZ79_09g09940	Chr09	14733386	14737019	DTZ79_09g09940	P	noTP	none	noTP	402
DTZ79_09g10490	Chr09	15625120	15627243	DTZ79_09g10490	DYW	noTP	none	noTP	707
DTZ79_09g11550	Chr09	16988703	16989764	DTZ79_09g11550	E+	noTP	none	noTP	353
DTZ79_09g11940	Chr09	17466522	17468036	DTZ79_09g11940	DYW	noTP	none	noTP	504
DTZ79_09g11950	Chr09	17468168	17468925	DTZ79_09g11950	E	noTP	none	noTP	239
DTZ79_09g11980	Chr09	17500150	17506314	DTZ79_09g11980	P	noTP	none	noTP	838
DTZ79_09g12450	Chr09	18085234	18087507	DTZ79_09g12450	DYW	mTP	possibly mitochondrial	mTP	660
DTZ79_10g00820	Chr10	1212780	1214553	DTZ79_10g00820	P	noTP	none	noTP	579
DTZ79_10g01770	Chr10	2690999	2693458	DTZ79_10g01770	DYW	noTP	mitochondrial	mTP	730
DTZ79_10g02750	Chr10	4002518	4004674	DTZ79_10g02750	P	mTP	possibly mitochondrial	mTP	637
DTZ79_10g03700	Chr10	5250328	5252250	DTZ79_10g03700	P	noTP	none	noTP	640
DTZ79_10g03860	Chr10	5462980	5467139	DTZ79_10g03860	P	noTP	none	noTP	697
DTZ79_10g04040	Chr10	5841253	5843739	DTZ79_10g04040	DYW	SP	ER	SP	828
DTZ79_10g05140	Chr10	7900201	7901085	DTZ79_10g05140	P	noTP	none	noTP	294
DTZ79_10g06780	Chr10	14154059	14161125	DTZ79_10g06780	P	noTP	ER	noTP	519
DTZ79_10g08040	Chr10	16885403	16889838	DTZ79_10g08040	E	noTP	none	noTP	458
DTZ79_10g11980	Chr10	22417235	22419351	DTZ79_10g11980	P	noTP	mitochondrial	mTP	567
DTZ79_11g00600	Chr11	634234	635847	DTZ79_11g00600	P	SP	ER	SP	537
DTZ79_11g02940	Chr11	3374892	3381022	DTZ79_11g02940	P	noTP	none	noTP	1154
DTZ79_11g04220	Chr11	5022128	5023861	DTZ79_11g04220	DYW	mTP	mitochondrial	mTP	577
DTZ79_11g05590	Chr11	8255503	8257977	DTZ79_11g05590	DYW	noTP	possibly mitochondrial	mTP	795
DTZ79_11g05690	Chr11	8424653	8426501	DTZ79_11g05690	P	SP	ER	SP	323
DTZ79_11g06470	Chr11	10936243	10941723	DTZ79_11g06470	P	noTP	none	noTP	1114
DTZ79_11g07050	Chr11	12528978	12530968	DTZ79_11g07050	P	noTP	none	noTP	272
DTZ79_11g07060	Chr11	12531257	12531664	DTZ79_11g07060	P	noTP	none	noTP	135
DTZ79_11g07470	Chr11	13293564	13295648	DTZ79_11g07470	DYW	noTP	none	noTP	694
DTZ79_11g07990	Chr11	14012697	14025055	DTZ79_11g07990	P	noTP	none	noTP	506
DTZ79_11g08000	Chr11	14019386	14025233	DTZ79_11g08000	P	noTP	none	noTP	571
DTZ79_11g08300	Chr11	14286343	14288806	DTZ79_11g08300	E+	noTP	possibly plastid	cTP	688
DTZ79_11g08500	Chr11	14445600	14447708	DTZ79_11g08500	E+	cTP	plastid	cTP	614
DTZ79_11g08970	Chr11	14893573	14895264	DTZ79_11g08970	DYW	noTP	none	noTP	563
DTZ79_11g09400	Chr11	15433352	15436179	DTZ79_11g09400	P	noTP	none	noTP	651
DTZ79_11g09930	Chr11	16178290	16179620	DTZ79_11g09930	E	noTP	possibly plastid	cTP	439
DTZ79_11g09960	Chr11	16206186	16207432	DTZ79_11g09960	DYW	noTP	none	noTP	412
DTZ79_11g12320	Chr11	19470297	19472928	DTZ79_11g12320	P	noTP	none	noTP	460
DTZ79_12g01930	Chr12	2228197	2229570	DTZ79_12g01930	E	noTP	none	noTP	457
DTZ79_12g02740	Chr12	3203364	3204775	DTZ79_12g02740	E	noTP	none	noTP	459
DTZ79_12g03140	Chr12	3787493	3791797	DTZ79_12g03140	DYW	noTP	possibly plastid	cTP	676
DTZ79_12g03200	Chr12	3876768	3879202	DTZ79_12g03200	E+	mTP	none	mTP	768
DTZ79_12g03570	Chr12	4450436	4453692	DTZ79_12g03570	P	noTP	none	noTP	215
DTZ79_12g04050	Chr12	5041013	5043197	DTZ79_12g04050	E+	mTP	mitochondrial	mTP	721
DTZ79_12g05850	Chr12	7598104	7604748	DTZ79_12g05850	E+	noTP	none	noTP	823
DTZ79_12g05900	Chr12	7646130	7652816	DTZ79_12g05900	E+	SP	ER	SP	776
DTZ79_12g06700	Chr12	9229166	9234156	DTZ79_12g06700	P	noTP	possibly mitochondrial	mTP	487
DTZ79_12g10940	Chr12	19843999	19845807	DTZ79_12g10940	E	noTP	none	noTP	602
DTZ79_12g11010	Chr12	19994600	19996579	DTZ79_12g11010	P	noTP	none	noTP	640
DTZ79_12g12970	Chr12	23449199	23450341	DTZ79_12g12970	E	noTP	none	noTP	340
DTZ79_12g13470	Chr12	24356710	24359275	DTZ79_12g13470	E	noTP	none	noTP	360
DTZ79_13g00060	Chr13	76893	82932	DTZ79_13g00060	P	cTP	possibly plastid	cTP	363
DTZ79_13g00070	Chr13	82980	85482	DTZ79_13g00070	P	noTP	possibly ER	noTP	211
DTZ79_13g00420	Chr13	351020	351640	DTZ79_13g00420	E	SP	ER	SP	206
DTZ79_13g00530	Chr13	439280	441619	DTZ79_13g00530	P	mTP	mitochondrial	mTP	779
DTZ79_13g01340	Chr13	1200204	1202225	DTZ79_13g01340	P	cTP	possibly mitochondrial	cTP	364
DTZ79_13g01650	Chr13	1402185	1404373	DTZ79_13g01650	E+	mTP	plastid	mTP	411
DTZ79_13g01660	Chr13	1405985	1408783	DTZ79_13g01660	E+	mTP	possibly mitochondrial	mTP	771
DTZ79_13g01860	Chr13	1604701	1611537	DTZ79_13g01860	P	noTP	none	noTP	183
DTZ79_13g03420	Chr13	3096915	3098480	DTZ79_13g03420	P	noTP	none	noTP	497
DTZ79_13g03810	Chr13	3405180	3406769	DTZ79_13g03810	E+	noTP	none	noTP	529
DTZ79_13g04760	Chr13	4442159	4446933	DTZ79_13g04760	E+	noTP	none	noTP	1141
DTZ79_13g11740	Chr13	14033643	14035306	DTZ79_13g11740	P	noTP	none	noTP	328
DTZ79_13g12110	Chr13	14530415	14547475	DTZ79_13g12110	P	mTP	mitochondrial	mTP	517
DTZ79_13g12210	Chr13	14651416	14653716	DTZ79_13g12210	P	noTP	possibly mitochondrial	mTP	499
DTZ79_13g13290	Chr13	16559679	16560581	DTZ79_13g13290	P	mTP	mitochondrial	mTP	300
DTZ79_13g13330	Chr13	16619071	16630945	DTZ79_13g13330	E	noTP	possibly mitochondrial	mTP	631
DTZ79_13g13340	Chr13	16623451	16626960	DTZ79_13g13340	E	noTP	possibly mitochondrial	mTP	325
DTZ79_13g14090	Chr13	17544258	17546200	DTZ79_13g14090	E	noTP	none	noTP	465
DTZ79_13g15520	Chr13	19663218	19666802	DTZ79_13g15520	P	noTP	possibly mitochondrial	mTP	534
DTZ79_13g15810	Chr13	19943556	19946291	DTZ79_13g15810	P	noTP	none	noTP	218
DTZ79_13g16820	Chr13	21048509	21053564	DTZ79_13g16820	P	noTP	none	noTP	886
DTZ79_13g16880	Chr13	21113630	21115378	DTZ79_13g16880	P	luTP	ER	luTP	510
DTZ79_13g18030	Chr13	22954338	22955555	DTZ79_13g18030	P	noTP	possibly ER	noTP	405
DTZ79_14g00690	Chr14	1022210	1032019	DTZ79_14g00690	P	noTP	none	noTP	575
DTZ79_14g00720	Chr14	1064291	1066417	DTZ79_14g00720	P	noTP	mitochondrial	mTP	708
DTZ79_14g01570	Chr14	2026136	2028867	DTZ79_14g01570	E	noTP	none	noTP	477
DTZ79_14g01740	Chr14	2188880	2190016	DTZ79_14g01740	DYW	noTP	possibly mitochondrial	mTP	287
DTZ79_14g02030	Chr14	2575348	2577453	DTZ79_14g02030	E+	noTP	possibly mitochondrial	mTP	701
DTZ79_14g02420	Chr14	2920161	2929582	DTZ79_14g02420	P	mTP	mitochondrial	mTP	599
DTZ79_14g04460	Chr14	5102410	5104848	DTZ79_14g04460	E+	noTP	none	noTP	812
DTZ79_14g08770	Chr14	12964095	12980080	DTZ79_14g08770	E+	noTP	possibly mitochondrial	mTP	741
DTZ79_14g10340	Chr14	16632374	16633642	DTZ79_14g10340	DYW	noTP	none	noTP	422
DTZ79_14g11390	Chr14	18523307	18530761	DTZ79_14g11390	DYW	mTP	possibly mitochondrial	mTP	617
DTZ79_14g11720	Chr14	18815381	18829160	DTZ79_14g11720	P	cTP	possibly plastid	cTP	1042
DTZ79_15g00800	Chr15	835757	837628	DTZ79_15g00800	P	cTP	plastid	cTP	623
DTZ79_15g00960	Chr15	1051201	1060340	DTZ79_15g00960	E	noTP	ER	noTP	994
DTZ79_15g01560	Chr15	2016318	2018363	DTZ79_15g01560	P	noTP	none	noTP	681
DTZ79_15g03620	Chr15	4754500	4757130	DTZ79_15g03620	P	noTP	none	noTP	876
DTZ79_15g04080	Chr15	5224532	5226680	DTZ79_15g04080	E	noTP	possibly plastid	cTP	651
DTZ79_15g06490	Chr15	8237794	8240452	DTZ79_15g06490	P	SP	possibly ER	SP	352
DTZ79_15g06820	Chr15	8689016	8702114	DTZ79_15g06820	P	noTP	none	noTP	876
DTZ79_15g06870	Chr15	8738673	8740668	DTZ79_15g06870	E+	noTP	none	noTP	629
DTZ79_15g07090	Chr15	8955465	8957090	DTZ79_15g07090	P	noTP	none	noTP	541
DTZ79_15g07270	Chr15	9187522	9189623	DTZ79_15g07270	P	noTP	none	noTP	554
DTZ79_15g08400	Chr15	11660134	11673318	DTZ79_15g08400	P	noTP	none	noTP	241
DTZ79_15g09110	Chr15	12880872	12884290	DTZ79_15g09110	P	noTP	none	noTP	390
DTZ79_15g10330	Chr15	14713853	14719337	DTZ79_15g10330	P	noTP	possibly mitochondrial	mTP	917
DTZ79_15g10410	Chr15	14771661	14777101	DTZ79_15g10410	P	mTP	none	mTP	875
DTZ79_15g10800	Chr15	15280964	15283264	DTZ79_15g10800	E+	SP	ER	SP	444
DTZ79_15g11400	Chr15	16008801	16014170	DTZ79_15g11400	P	mTP	mitochondrial	mTP	624
DTZ79_15g11850	Chr15	16550938	16554505	DTZ79_15g11850	P	noTP	possibly mitochondrial	mTP	574
DTZ79_15g11900	Chr15	16591464	16594671	DTZ79_15g11900	DYW	noTP	possibly plastid	cTP	507
DTZ79_15g12050	Chr15	16757802	16761901	DTZ79_15g12050	E	noTP	none	noTP	460
DTZ79_15g12120	Chr15	16810673	16815015	DTZ79_15g12120	P	mTP	mitochondrial	mTP	464
DTZ79_15g12130	Chr15	16819805	16833941	DTZ79_15g12130	P	noTP	none	noTP	730
DTZ79_15g12920	Chr15	17869482	17870618	DTZ79_15g12920	P	noTP	possibly mitochondrial	mTP	326
DTZ79_15g12960	Chr15	17880410	17884549	DTZ79_15g12960	P	noTP	none	noTP	453
DTZ79_15g13280	Chr15	18123702	18126068	DTZ79_15g13280	P	noTP	possibly mitochondrial	mTP	623
DTZ79_15g14080	Chr15	19049746	19054844	DTZ79_15g14080	DYW	noTP	none	noTP	721
DTZ79_15g14210	Chr15	19180113	19182500	DTZ79_15g14210	P	mTP	mitochondrial	mTP	528
DTZ79_15g15310	Chr15	21011331	21020305	DTZ79_15g15310	P	noTP	none	noTP	169
DTZ79_16g00250	Chr16	306145	307336	DTZ79_16g00250	P	noTP	none	noTP	254
DTZ79_16g01520	Chr16	1604539	1607516	DTZ79_16g01520	E	mTP	mitochondrial	mTP	689
DTZ79_16g03190	Chr16	3098543	3100426	DTZ79_16g03190	P	mTP	mitochondrial	mTP	627
DTZ79_16g03500	Chr16	3396885	3399860	DTZ79_16g03500	E+	SP	ER	SP	425
DTZ79_16g03640	Chr16	3553010	3554433	DTZ79_16g03640	P	mTP	plastid	mTP	445
DTZ79_16g04240	Chr16	4097539	4098761	DTZ79_16g04240	E	noTP	none	noTP	309
DTZ79_16g04620	Chr16	4495535	4500100	DTZ79_16g04620	P	SP	ER	SP	964
DTZ79_16g06110	Chr16	5998257	6000353	DTZ79_16g06110	E	noTP	none	noTP	698
DTZ79_16g07270	Chr16	7497488	7502829	DTZ79_16g07270	P	noTP	none	noTP	533
DTZ79_16g07340	Chr16	7574073	7575077	DTZ79_16g07340	P	mTP	possibly mitochondrial	mTP	302
DTZ79_16g07690	Chr16	8007935	8010535	DTZ79_16g07690	P	noTP	none	noTP	866
DTZ79_16g08070	Chr16	8577752	8579895	DTZ79_16g08070	DYW	noTP	none	noTP	701
DTZ79_16g08100	Chr16	8600143	8602359	DTZ79_16g08100	P	noTP	none	noTP	738
DTZ79_16g10980	Chr16	15406962	15410874	DTZ79_16g10980	E	noTP	none	noTP	804
DTZ79_16g11370	Chr16	17544860	17551602	DTZ79_16g11370	P	noTP	none	noTP	538
DTZ79_16g13300	Chr16	28524252	28525649	DTZ79_16g13300	P	noTP	none	noTP	333
DTZ79_17g00300	Chr17	481965	483296	DTZ79_17g00300	E+	noTP	none	noTP	339
DTZ79_17g00360	Chr17	561028	563114	DTZ79_17g00360	DYW	noTP	none	noTP	440
DTZ79_17g01170	Chr17	1570103	1573481	DTZ79_17g01170	DYW	mTP	possibly mitochondrial	mTP	321
DTZ79_17g01540	Chr17	2037473	2039801	DTZ79_17g01540	E+	noTP	none	noTP	751
DTZ79_17g03490	Chr17	4800939	4802484	DTZ79_17g03490	E	SP	ER	SP	482
DTZ79_17g05240	Chr17	8763125	8767166	DTZ79_17g05240	DYW	noTP	possibly mitochondrial	mTP	815
DTZ79_17g05390	Chr17	9098677	9101436	DTZ79_17g05390	P	cTP	plastid	cTP	919
DTZ79_17g05970	Chr17	11116596	11140737	DTZ79_17g05970	P	noTP	none	noTP	216
DTZ79_17g09690	Chr17	17587161	17590063	DTZ79_17g09690	P	noTP	none	noTP	501
DTZ79_17g11070	Chr17	19478107	19482813	DTZ79_17g11070	P	noTP	none	noTP	394
DTZ79_18g00940	Chr18	1212148	1214936	DTZ79_18g00940	E+	noTP	plastid	cTP	895
DTZ79_18g00970	Chr18	1263026	1270247	DTZ79_18g00970	E+	noTP	none	noTP	963
DTZ79_18g01510	Chr18	2126473	2128758	DTZ79_18g01510	P	noTP	none	noTP	761
DTZ79_18g01910	Chr18	2722225	2723664	DTZ79_18g01910	P	noTP	possibly plastid	cTP	441
DTZ79_18g01930	Chr18	2738296	2740872	DTZ79_18g01930	E	noTP	possibly mitochondrial	mTP	706
DTZ79_18g03430	Chr18	5092276	5094411	DTZ79_18g03430	E+	noTP	none	noTP	711
DTZ79_18g04160	Chr18	6177237	6178913	DTZ79_18g04160	E+	mTP	possibly mitochondrial	mTP	476
DTZ79_18g05750	Chr18	12968270	12971925	DTZ79_18g05750	P	cTP	none	cTP	935
DTZ79_18g06030	Chr18	13432573	13437403	DTZ79_18g06030	E+	noTP	none	noTP	538
DTZ79_18g07000	Chr18	15073130	15078600	DTZ79_18g07000	E+	mTP	mitochondrial	mTP	904
DTZ79_18g07010	Chr18	15074170	15080706	DTZ79_18g07010	E+	noTP	none	noTP	744
DTZ79_18g07920	Chr18	16198584	16203551	DTZ79_18g07920	P	noTP	none	noTP	425
DTZ79_18g09270	Chr18	17998247	18000807	DTZ79_18g09270	P	noTP	possibly ER	noTP	716
DTZ79_18g11490	Chr18	21285638	21289468	DTZ79_18g11490	E	noTP	none	noTP	738
DTZ79_18g12500	Chr18	22698404	22704522	DTZ79_18g12500	P	cTP	none	cTP	804
DTZ79_18g13870	Chr18	24410994	24415226	DTZ79_18g13870	P	noTP	none	noTP	646
DTZ79_18g14000	Chr18	24587269	24590775	DTZ79_18g14000	P	mTP	none	mTP	519
DTZ79_19g00310	Chr19	2319836	2322388	DTZ79_19g00310	E+	mTP	none	mTP	850
DTZ79_19g00430	Chr19	3036446	3039867	DTZ79_19g00430	E+	noTP	none	noTP	839
DTZ79_19g00620	Chr19	3789464	3790891	DTZ79_19g00620	P	noTP	none	noTP	475
DTZ79_19g00680	Chr19	3932029	3935910	DTZ79_19g00680	P	noTP	possibly plastid	cTP	342
DTZ79_19g01110	Chr19	6093793	6099254	DTZ79_19g01110	DYW	noTP	none	noTP	945
DTZ79_19g01130	Chr19	6385125	6387825	DTZ79_19g01130	E+	noTP	none	noTP	426
DTZ79_19g02110	Chr19	8694410	8695491	DTZ79_19g02110	P	noTP	plastid	cTP	349
DTZ79_19g02120	Chr19	8695509	8704940	DTZ79_19g02120	P	noTP	no terminal Met	noTP	539
DTZ79_19g03720	Chr19	11524264	11531258	DTZ79_19g03720	P	noTP	none	noTP	595
DTZ79_19g05630	Chr19	14538632	14541783	DTZ79_19g05630	P	noTP	none	noTP	1037
DTZ79_19g06130	Chr19	15130185	15132391	DTZ79_19g06130	P	noTP	none	noTP	612
DTZ79_19g07280	Chr19	16510387	16516853	DTZ79_19g07280	P	noTP	none	noTP	446
DTZ79_19g08760	Chr19	18133259	18136531	DTZ79_19g08760	P	cTP	none	cTP	352
DTZ79_19g09770	Chr19	19284598	19285801	DTZ79_19g09770	E+	noTP	possibly mitochondrial	mTP	392
DTZ79_19g10180	Chr19	19713730	19716200	DTZ79_19g10180	DYW	noTP	possibly mitochondrial	mTP	688
DTZ79_19g10970	Chr19	20564734	20565722	DTZ79_19g10970	DYW	noTP	none	noTP	299
DTZ79_19g11090	Chr19	20712248	20717910	DTZ79_19g11090	P	noTP	none	noTP	594
DTZ79_19g11570	Chr19	21239185	21240647	DTZ79_19g11570	P	noTP	none	noTP	475
DTZ79_19g11600	Chr19	21257968	21259665	DTZ79_19g11600	E	noTP	none	noTP	565
DTZ79_19g12090	Chr19	21745793	21748422	DTZ79_19g12090	P	noTP	none	noTP	840
DTZ79_19g12710	Chr19	22431254	22433351	DTZ79_19g12710	P	noTP	none	noTP	680
DTZ79_19g14530	Chr19	24195573	24200273	DTZ79_19g14530	P	mTP	mitochondrial	mTP	694
DTZ79_20g00100	Chr20	125724	131129	DTZ79_20g00100	P	noTP	possibly ER	noTP	813
DTZ79_20g00380	Chr20	415422	421730	DTZ79_20g00380	P	noTP	ER	noTP	770
DTZ79_20g00460	Chr20	490416	493766	DTZ79_20g00460	E+	noTP	none	noTP	307
DTZ79_20g00960	Chr20	1260482	1261695	DTZ79_20g00960	E	noTP	none	noTP	366
DTZ79_20g01010	Chr20	1352549	1353593	DTZ79_20g01010	E	noTP	none	noTP	232
DTZ79_20g01130	Chr20	1467695	1468729	DTZ79_20g01130	E	mTP	mitochondrial	mTP	311
DTZ79_20g01230	Chr20	1615873	1617423	DTZ79_20g01230	P	noTP	possibly mitochondrial	mTP	516
DTZ79_20g01450	Chr20	1867351	1869230	DTZ79_20g01450	P	mTP	possibly mitochondrial	mTP	586
DTZ79_20g01540	Chr20	1934671	1936512	DTZ79_20g01540	E	noTP	none	noTP	613
DTZ79_20g01980	Chr20	2499765	2503984	DTZ79_20g01980	P	noTP	mitochondrial	mTP	443
DTZ79_20g02050	Chr20	2561179	2563347	DTZ79_20g02050	P	noTP	possibly mitochondrial	noTP	722
DTZ79_20g03280	Chr20	4142094	4144589	DTZ79_20g03280	P	cTP	plastid	cTP	831
DTZ79_20g03820	Chr20	4837530	4838771	DTZ79_20g03820	P	cTP	possibly plastid	cTP	299
DTZ79_20g03920	Chr20	4988208	4991281	DTZ79_20g03920	P	noTP	none	noTP	994
DTZ79_20g04040	Chr20	5215168	5220458	DTZ79_20g04040	P	luTP	plastid	luTP	785
DTZ79_20g04190	Chr20	5384024	5386561	DTZ79_20g04190	P	noTP	none	noTP	795
DTZ79_20g04560	Chr20	5966282	5970288	DTZ79_20g04560	E	cTP	none	cTP	703
DTZ79_20g05360	Chr20	7287010	7289499	DTZ79_20g05360	E	mTP	possibly mitochondrial	mTP	829
DTZ79_20g05470	Chr20	7402671	7406077	DTZ79_20g05470	DYW	noTP	ER	noTP	686
DTZ79_20g05480	Chr20	7402793	7405781	DTZ79_20g05480	DYW	noTP	possibly plastid	cTP	328
DTZ79_20g05820	Chr20	7844601	7847305	DTZ79_20g05820	E+	mTP	mitochondrial	mTP	733
DTZ79_20g06030	Chr20	8088758	8091978	DTZ79_20g06030	E+	mTP	mitochondrial	mTP	519
DTZ79_20g07200	Chr20	9545450	9547640	DTZ79_20g07200	P	noTP	possibly ER	noTP	510
DTZ79_20g07260	Chr20	9597591	9598723	DTZ79_20g07260	P	noTP	none	noTP	340
DTZ79_20g07550	Chr20	10279640	10281025	DTZ79_20g07550	E	noTP	possibly mitochondrial	mTP	271
DTZ79_20g07870	Chr20	11279843	11284162	DTZ79_20g07870	E	noTP	none	noTP	730
DTZ79_20g08290	Chr20	12383634	12389081	DTZ79_20g08290	E+	noTP	possibly mitochondrial	mTP	1014
DTZ79_20g08490	Chr20	12837987	12841384	DTZ79_20g08490	E+	mTP	mitochondrial	mTP	937
DTZ79_20g08540	Chr20	12886172	12891083	DTZ79_20g08540	P	mTP	none	mTP	1123
DTZ79_20g08770	Chr20	13296463	13304206	DTZ79_20g08770	P	mTP	mitochondrial	mTP	547
DTZ79_20g09220	Chr20	14168058	14168733	DTZ79_20g09220	E	noTP	none	noTP	111
DTZ79_20g09630	Chr20	15081538	15085680	DTZ79_20g09630	DYW	noTP	none	noTP	503
DTZ79_20g09780	Chr20	15360428	15365773	DTZ79_20g09780	P	noTP	none	noTP	621
DTZ79_20g10740	Chr20	16648603	16655961	DTZ79_20g10740	P	mTP	none	mTP	837
DTZ79_20g10920	Chr20	16966565	16971987	DTZ79_20g10920	E	noTP	none	noTP	656
DTZ79_20g11200	Chr20	17604819	17611074	DTZ79_20g11200	DYW	mTP	plastid	mTP	640
DTZ79_20g11330	Chr20	17794823	17796823	DTZ79_20g11330	E	noTP	none	noTP	666
DTZ79_20g11400	Chr20	17966380	17968081	DTZ79_20g11400	DYW	mTP	mitochondrial	mTP	358
DTZ79_20g13810	Chr20	20815052	20819295	DTZ79_20g13810	E	noTP	none	noTP	765
DTZ79_20g15040	Chr20	22797176	22803651	DTZ79_20g15040	P	noTP	none	noTP	720
DTZ79_20g15320	Chr20	23184075	23184959	DTZ79_20g15320	E	noTP	none	noTP	294
DTZ79_21g00790	Chr21	799539	802546	DTZ79_21g00790	P	noTP	plastid	cTP	322
DTZ79_21g01060	Chr21	1035920	1039670	DTZ79_21g01060	DYW	mTP	plastid	cTP	337
DTZ79_21g01180	Chr21	1173131	1175638	DTZ79_21g01180	DYW	noTP	plastid	cTP	766
DTZ79_21g01240	Chr21	1250410	1254547	DTZ79_21g01240	P	noTP	no terminal Met	noTP	569
DTZ79_21g01960	Chr21	2049238	2050936	DTZ79_21g01960	E	noTP	none	noTP	418
DTZ79_21g02010	Chr21	2107117	2109375	DTZ79_21g02010	E	noTP	none	noTP	752
DTZ79_21g02650	Chr21	2770315	2778909	DTZ79_21g02650	P	mTP	mitochondrial	mTP	990
DTZ79_21g03330	Chr21	3421543	3424083	DTZ79_21g03330	DYW	noTP	none	noTP	298
DTZ79_21g03390	Chr21	3542801	3546851	DTZ79_21g03390	DYW	noTP	none	noTP	624
DTZ79_21g05380	Chr21	5787960	5790706	DTZ79_21g05380	DYW	noTP	none	noTP	678
DTZ79_21g05400	Chr21	5802411	5803643	DTZ79_21g05400	P	noTP	none	noTP	174
DTZ79_21g05710	Chr21	6151497	6153075	DTZ79_21g05710	P	noTP	possibly mitochondrial	mTP	359
DTZ79_21g05840	Chr21	6311554	6316012	DTZ79_21g05840	P	noTP	none	noTP	539
DTZ79_21g07760	Chr21	9350709	9367944	DTZ79_21g07760	DYW	noTP	none	noTP	1738
DTZ79_21g07770	Chr21	9353759	9372258	DTZ79_21g07770	DYW	noTP	none	noTP	1185
DTZ79_21g07850	Chr21	9513398	9516828	DTZ79_21g07850	E	noTP	none	noTP	669
DTZ79_21g08040	Chr21	9764149	9771302	DTZ79_21g08040	E+	noTP	none	noTP	681
DTZ79_21g08250	Chr21	10218216	10221144	DTZ79_21g08250	P	SP	none	SP	501
DTZ79_21g09030	Chr21	12828125	12829098	DTZ79_21g09030	DYW	noTP	none	noTP	291
DTZ79_21g09780	Chr21	14435704	14438482	DTZ79_21g09780	DYW	noTP	none	noTP	824
DTZ79_21g10690	Chr21	15924811	15927869	DTZ79_21g10690	E	noTP	possibly mitochondrial	mTP	701
DTZ79_21g11990	Chr21	17801916	17805076	DTZ79_21g11990	P	noTP	none	noTP	509
DTZ79_21g12000	Chr21	17806272	17807599	DTZ79_21g12000	P	noTP	none	noTP	421
DTZ79_22g00640	Chr22	1043001	1044423	DTZ79_22g00640	P	noTP	plastid	cTP	465
DTZ79_22g01230	Chr22	2233708	2235942	DTZ79_22g01230	P	noTP	none	noTP	258
DTZ79_22g01710	Chr22	3333578	3335361	DTZ79_22g01710	E+	noTP	possibly mitochondrial	mTP	514
DTZ79_22g02310	Chr22	4464192	4470236	DTZ79_22g02310	DYW	noTP	none	noTP	1136
DTZ79_22g02750	Chr22	5543171	5563990	DTZ79_22g02750	P	noTP	none	noTP	965
DTZ79_22g03570	Chr22	9414662	9420198	DTZ79_22g03570	P	noTP	none	noTP	763
DTZ79_22g03740	Chr22	9924798	9926567	DTZ79_22g03740	P	noTP	plastid	cTP	589
DTZ79_22g03750	Chr22	9928476	9933395	DTZ79_22g03750	P	noTP	none	noTP	219
DTZ79_22g06010	Chr22	14184052	14185630	DTZ79_22g06010	P	noTP	none	noTP	373
DTZ79_22g06130	Chr22	14337264	14342542	DTZ79_22g06130	DYW	noTP	none	noTP	666
DTZ79_22g09030	Chr22	18191565	18193140	DTZ79_22g09030	E	noTP	ER	noTP	417
DTZ79_22g10380	Chr22	19756821	19759366	DTZ79_22g10380	E	noTP	possibly mitochondrial	mTP	512
DTZ79_22g10680	Chr22	20121827	20123944	DTZ79_22g10680	E+	noTP	possibly mitochondrial	mTP	705
DTZ79_22g11400	Chr22	20830162	20831188	DTZ79_22g11400	P	mTP	possibly mitochondrial	mTP	337
DTZ79_22g11410	Chr22	20831305	20832258	DTZ79_22g11410	P	noTP	possibly mitochondrial	mTP	219
DTZ79_22g12930	Chr22	22609517	22611797	DTZ79_22g12930	P	noTP	none	noTP	694
DTZ79_23g01420	Chr23	1369506	1374717	DTZ79_23g01420	P	noTP	none	noTP	872
DTZ79_23g01530	Chr23	1446574	1450488	DTZ79_23g01530	P	noTP	none	noTP	534
DTZ79_23g03120	Chr23	3110704	3117087	DTZ79_23g03120	E+	mTP	mitochondrial	mTP	1065
DTZ79_23g03450	Chr23	3453751	3454888	DTZ79_23g03450	P	noTP	none	noTP	370
DTZ79_23g04180	Chr23	4193580	4195937	DTZ79_23g04180	E	noTP	none	noTP	272
DTZ79_23g04850	Chr23	4842141	4843931	DTZ79_23g04850	E	mTP	mitochondrial	mTP	596
DTZ79_23g05120	Chr23	5153856	5157276	DTZ79_23g05120	P	noTP	possibly mitochondrial	mTP	533
DTZ79_23g05410	Chr23	5481127	5484839	DTZ79_23g05410	P	noTP	none	noTP	488
DTZ79_23g07440	Chr23	9934009	9936760	DTZ79_23g07440	E	noTP	none	noTP	599
DTZ79_23g07560	Chr23	10242042	10243780	DTZ79_23g07560	P	noTP	none	noTP	384
DTZ79_23g07630	Chr23	10303683	10309670	DTZ79_23g07630	E+	mTP	none	mTP	712
DTZ79_23g07750	Chr23	10516902	10520805	DTZ79_23g07750	P	mTP	mitochondrial	mTP	455
DTZ79_23g09790	Chr23	13121397	13123099	DTZ79_23g09790	P	mTP	possibly mitochondrial	mTP	470
DTZ79_23g10170	Chr23	13588118	13588778	DTZ79_23g10170	P	noTP	none	noTP	215
DTZ79_23g10180	Chr23	13588862	13589986	DTZ79_23g10180	P	noTP	none	noTP	339
DTZ79_23g12050	Chr23	15833893	15840569	DTZ79_23g12050	P	cTP	plastid	cTP	551
DTZ79_23g12470	Chr23	16290657	16299545	DTZ79_23g12470	P	noTP	none	noTP	673
DTZ79_23g12980	Chr23	16865009	16865929	DTZ79_23g12980	DYW	noTP	none	noTP	277
DTZ79_23g15820	Chr23	19774160	19778186	DTZ79_23g15820	DYW	noTP	none	noTP	644
DTZ79_23g19270	Chr23	23555589	23556665	DTZ79_23g19270	P	noTP	none	noTP	273
DTZ79_24g00580	Chr24	752484	755073	DTZ79_24g00580	P	noTP	none	noTP	695
DTZ79_24g01100	Chr24	1401368	1403511	DTZ79_24g01100	P	mTP	possibly mitochondrial	mTP	447
DTZ79_24g01680	Chr24	2398988	2403204	DTZ79_24g01680	P	noTP	possibly plastid	cTP	890
DTZ79_24g01960	Chr24	2713566	2717110	DTZ79_24g01960	DYW	mTP	possibly mitochondrial	mTP	676
DTZ79_24g03330	Chr24	4539772	4541460	DTZ79_24g03330	P	mTP	possibly mitochondrial	mTP	562
DTZ79_24g03770	Chr24	5307203	5310410	DTZ79_24g03770	P	noTP	none	noTP	354
DTZ79_24g03830	Chr24	5357676	5358970	DTZ79_24g03830	E	noTP	none	noTP	401
DTZ79_24g03970	Chr24	5536855	5543671	DTZ79_24g03970	P	mTP	mitochondrial	mTP	649
DTZ79_24g03990	Chr24	5556715	5558507	DTZ79_24g03990	P	noTP	none	noTP	553
DTZ79_24g04680	Chr24	6762981	6765197	DTZ79_24g04680	P	noTP	none	noTP	738
DTZ79_24g05010	Chr24	7319165	7332647	DTZ79_24g05010	P	noTP	none	noTP	588
DTZ79_24g05290	Chr24	7808450	7838615	DTZ79_24g05290	P	noTP	none	noTP	885
DTZ79_24g05640	Chr24	8355937	8358762	DTZ79_24g05640	P	noTP	none	noTP	941
DTZ79_24g06360	Chr24	10254768	10256408	DTZ79_24g06360	P	noTP	none	noTP	336
DTZ79_24g07300	Chr24	12351488	12362698	DTZ79_24g07300	P	noTP	none	noTP	305
DTZ79_24g07310	Chr24	12362880	12363990	DTZ79_24g07310	P	noTP	plastid	cTP	356
DTZ79_24g09310	Chr24	15043820	15046327	DTZ79_24g09310	E+	noTP	none	noTP	656
DTZ79_24g10310	Chr24	16199500	16209544	DTZ79_24g10310	E	noTP	possibly mitochondrial	mTP	739
DTZ79_24g12120	Chr24	18577430	18583855	DTZ79_24g12120	P	noTP	possibly ER	noTP	657
DTZ79_24g13320	Chr24	20477891	20479682	DTZ79_24g13320	P	noTP	none	noTP	595
DTZ79_25g00320	Chr25	1137039	1143101	DTZ79_25g00320	P	noTP	possibly mitochondrial	mTP	872
DTZ79_25g00790	Chr25	2776958	2791361	DTZ79_25g00790	DYW	mTP	mitochondrial	mTP	694
DTZ79_25g00960	Chr25	3752370	3755576	DTZ79_25g00960	E	noTP	plastid	cTP	478
DTZ79_25g02320	Chr25	9161591	9169716	DTZ79_25g02320	P	noTP	none	noTP	773
DTZ79_25g03090	Chr25	10434350	10437565	DTZ79_25g03090	E	noTP	plastid	cTP	596
DTZ79_25g04070	Chr25	12358517	12364507	DTZ79_25g04070	P	noTP	none	noTP	621
DTZ79_25g04880	Chr25	13746952	13760966	DTZ79_25g04880	P	noTP	possibly plastid	cTP	994
DTZ79_25g05080	Chr25	14046476	14049357	DTZ79_25g05080	E+	mTP	none	mTP	820
DTZ79_25g08240	Chr25	17820194	17822364	DTZ79_25g08240	P	noTP	mitochondrial	mTP	464
DTZ79_25g08960	Chr25	18775414	18776228	DTZ79_25g08960	P	mTP	mitochondrial	mTP	262
DTZ79_25g09770	Chr25	19807206	19808840	DTZ79_25g09770	E	noTP	none	noTP	544
DTZ79_25g11470	Chr25	22381427	22382958	DTZ79_25g11470	P	noTP	plastid	cTP	500
DTZ79_26g00530	Chr26	3059681	3068100	DTZ79_26g00530	E+	noTP	none	noTP	720
DTZ79_26g00840	Chr26	4251725	4257841	DTZ79_26g00840	E	mTP	mitochondrial	mTP	1169
DTZ79_26g02160	Chr26	6834102	6835553	DTZ79_26g02160	E	noTP	none	noTP	483
DTZ79_26g03370	Chr26	8723651	8726173	DTZ79_26g03370	P	noTP	none	noTP	802
DTZ79_26g04420	Chr26	9864673	9867870	DTZ79_26g04420	E	mTP	mitochondrial	mTP	443
DTZ79_26g04510	Chr26	9939768	9945246	DTZ79_26g04510	DYW	SP	ER	SP	234
DTZ79_26g05430	Chr26	11298896	11304592	DTZ79_26g05430	P	noTP	none	noTP	560
DTZ79_26g06410	Chr26	12573868	12579161	DTZ79_26g06410	DYW	noTP	possibly mitochondrial	mTP	868
DTZ79_26g06560	Chr26	12767169	12792315	DTZ79_26g06560	P	noTP	none	noTP	789
DTZ79_26g07020	Chr26	13368177	13370168	DTZ79_26g07020	P	cTP	plastid	cTP	573
DTZ79_26g07030	Chr26	13368235	13370546	DTZ79_26g07030	P	noTP	none	noTP	339
DTZ79_26g07210	Chr26	13621303	13624271	DTZ79_26g07210	P	cTP	possibly plastid	cTP	369
DTZ79_26g07440	Chr26	13915042	13919758	DTZ79_26g07440	P	mTP	possibly mitochondrial	mTP	500
DTZ79_26g08930	Chr26	15743998	15748178	DTZ79_26g08930	DYW	noTP	none	noTP	333
DTZ79_26g08940	Chr26	15745897	15749659	DTZ79_26g08940	DYW	noTP	mitochondrial	mTP	694
DTZ79_26g10570	Chr26	17957365	17960077	DTZ79_26g10570	P	noTP	none	noTP	822
DTZ79_26g12480	Chr26	20297719	20299327	DTZ79_26g12480	DYW	noTP	none	noTP	298
DTZ79_27g00090	Chr27	140134	144972	DTZ79_27g00090	DYW	noTP	none	noTP	1133
DTZ79_27g00100	Chr27	145686	148126	DTZ79_27g00100	E+	mTP	mitochondrial	mTP	339
DTZ79_27g00320	Chr27	377956	382232	DTZ79_27g00320	P	noTP	none	noTP	841
DTZ79_27g01110	Chr27	1103736	1105982	DTZ79_27g01110	P	cTP	plastid	cTP	748
DTZ79_27g01530	Chr27	1498133	1500319	DTZ79_27g01530	E+	noTP	none	noTP	694
DTZ79_27g02120	Chr27	2011136	2013149	DTZ79_27g02120	P	noTP	none	noTP	651
DTZ79_27g02730	Chr27	2587652	2591627	DTZ79_27g02730	P	noTP	possibly plastid	cTP	1154
DTZ79_27g02750	Chr27	2597299	2601722	DTZ79_27g02750	E	noTP	none	noTP	566
DTZ79_27g02800	Chr27	2666145	2670712	DTZ79_27g02800	P	noTP	none	noTP	626
DTZ79_27g02940	Chr27	2807754	2809050	DTZ79_27g02940	E	noTP	none	noTP	239
DTZ79_27g03070	Chr27	2911521	2915626	DTZ79_27g03070	P	mTP	mitochondrial	mTP	486
DTZ79_27g03110	Chr27	2946281	2948320	DTZ79_27g03110	E+	mTP	possibly mitochondrial	mTP	679
DTZ79_27g03670	Chr27	3698321	3701007	DTZ79_27g03670	E+	noTP	none	noTP	868
DTZ79_27g03770	Chr27	3779833	3781782	DTZ79_27g03770	P	mTP	mitochondrial	mTP	649
DTZ79_27g03860	Chr27	3899982	3901931	DTZ79_27g03860	P	mTP	possibly mitochondrial	mTP	649
DTZ79_27g04650	Chr27	4838357	4840166	DTZ79_27g04650	E+	noTP	possibly mitochondrial	mTP	445
DTZ79_27g05080	Chr27	5399039	5404416	DTZ79_27g05080	DYW	noTP	none	noTP	795
DTZ79_27g05620	Chr27	5955319	5956524	DTZ79_27g05620	E	noTP	none	noTP	372
DTZ79_27g06100	Chr27	6553600	6557276	DTZ79_27g06100	DYW	noTP	plastid	cTP	672
DTZ79_27g06260	Chr27	6779513	6782091	DTZ79_27g06260	DYW	SP	ER	SP	765
DTZ79_27g11140	Chr27	19875594	19877604	DTZ79_27g11140	P	noTP	mitochondrial	mTP	375
DTZ79_28g00650	Chr28	951509	957607	DTZ79_28g00650	P	noTP	none	noTP	735
DTZ79_28g00720	Chr28	1122324	1127869	DTZ79_28g00720	P	noTP	none	noTP	557
DTZ79_28g01950	Chr28	2667285	2669336	DTZ79_28g01950	E	noTP	possibly plastid	cTP	449
DTZ79_28g02230	Chr28	3097151	3103973	DTZ79_28g02230	P	noTP	none	noTP	498
DTZ79_28g03980	Chr28	6063072	6065257	DTZ79_28g03980	E	noTP	none	noTP	647
DTZ79_28g04010	Chr28	6157427	6161271	DTZ79_28g04010	E+	noTP	none	noTP	628
DTZ79_28g06830	Chr28	11151384	11155010	DTZ79_28g06830	E+	mTP	mitochondrial	mTP	351
DTZ79_28g06840	Chr28	11152637	11158448	DTZ79_28g06840	E+	noTP	none	noTP	678
DTZ79_28g09700	Chr28	14970596	14975066	DTZ79_28g09700	P	noTP	none	noTP	531
DTZ79_28g10890	Chr28	16460809	16464046	DTZ79_28g10890	P	noTP	none	noTP	907
DTZ79_28g11360	Chr28	17013484	17015190	DTZ79_28g11360	P	noTP	possibly plastid	cTP	532
DTZ79_28g11440	Chr28	17103255	17113206	DTZ79_28g11440	P	noTP	none	noTP	559
DTZ79_28g11450	Chr28	17113227	17114035	DTZ79_28g11450	P	noTP	none	noTP	237
DTZ79_28g11530	Chr28	17266739	17268643	DTZ79_28g11530	P	noTP	none	noTP	634
DTZ79_28g12140	Chr28	17997111	17999184	DTZ79_28g12140	E	mTP	possibly mitochondrial	mTP	550
DTZ79_29g00380	Chr29	795094	804377	DTZ79_29g00380	E+	noTP	none	noTP	860
DTZ79_29g03290	Chr29	4405519	4406280	DTZ79_29g03290	P	mTP	possibly mitochondrial	mTP	253
DTZ79_29g03300	Chr29	4406360	4406977	DTZ79_29g03300	P	noTP	none	noTP	205
DTZ79_29g04090	Chr29	5340424	5345492	DTZ79_29g04090	P	mTP	mitochondrial	mTP	590
DTZ79_29g04400	Chr29	5756139	5757938	DTZ79_29g04400	P	cTP	plastid	cTP	599
DTZ79_29g04530	Chr29	5926394	5937469	DTZ79_29g04530	E	mTP	ER	mTP	494
DTZ79_29g04630	Chr29	6009080	6010879	DTZ79_29g04630	P	noTP	none	noTP	599
DTZ79_29g04980	Chr29	6773098	6773643	DTZ79_29g04980	P	noTP	none	noTP	167
DTZ79_29g04990	Chr29	6799264	6800539	DTZ79_29g04990	P	noTP	none	noTP	296
DTZ79_29g06780	Chr29	9889094	9890191	DTZ79_29g06780	E	mTP	none	mTP	365
DTZ79_29g07090	Chr29	10327578	10329833	DTZ79_29g07090	P	noTP	none	noTP	751
DTZ79_29g07860	Chr29	12845357	12846555	DTZ79_29g07860	P	mTP	possibly mitochondrial	mTP	365
DTZ79_29g09560	Chr29	16752486	16754240	DTZ79_29g09560	E+	mTP	possibly mitochondrial	mTP	575
DTZ79_29g10680	Chr29	18284868	18287068	DTZ79_29g10680	DYW	noTP	none	noTP	409
DTZ79_29g12400	Chr29	20719384	20726021	DTZ79_29g12400	E+				920
DTZ79_29g13840	Chr29	23388773	23389921	DTZ79_29g13840	DYW				382

## Sheet: S3
Table S3: Detailed information of PPRs modules during the fruit development and maturation of Actinidia chinensis
Module_turquoise	Subfamily	Module_blue	Subfamily	Module_brown	Subfamily	Module_grey	Subfamily
Actinidia00227.t1	P	Actinidia40353.t1	P	Actinidia06968.t1	P	Actinidia09890.t1	E+
Actinidia00245.t1	E	Actinidia04949.t1	P	Actinidia08466.t1	P	Actinidia10706.t1	P
Actinidia00669.t1	P	Actinidia04954.t1	P	Actinidia08636.t1	DYW	Actinidia10980.t1	E+
Actinidia00858.t1	P	Actinidia05652.t1	DYW	Actinidia08649.t1	P	Actinidia11979.t1	P
Actinidia01117.t1	P	Actinidia40273.t1	P	Actinidia09879.t1	P	Actinidia12264.t1	P
Actinidia01299.t1	P	Actinidia06003.t1	P			Actinidia12681.t1	E
Actinidia01363.t1	P	Actinidia06447.t1	P			Actinidia12984.t1	P
Actinidia01627.t1	P					Actinidia13442.t1	P
Actinidia01760.t1	P					Actinidia13718.t1	P
Actinidia01885.t1	P					Actinidia14396.t1	P
Actinidia01961.t1	E					Actinidia14730.t1	P
Actinidia02637.t1	P					Actinidia15242.t1	E+
Actinidia03030.t1	P					Actinidia15490.t1	P
Actinidia03250.t1	P					Actinidia15785.t1	P
Actinidia03522.t1	E+					Actinidia16042.t1	P
Actinidia03531.t1	DYW					Actinidia17037.t1	P
Actinidia03646.t1	P					Actinidia17838.t1	P
Actinidia03844.t3	P					Actinidia17867.t1	DYW
Actinidia03955.t1	P					Actinidia17908.t1	P
Actinidia04338.t1	E+					Actinidia18285.t1	E
Actinidia04364.t1	P					Actinidia18473.t1	P
Actinidia04405.t1	P					Actinidia19361.t1	E+
Actinidia04473.t1	P					Actinidia19409.t1	P
Actinidia04475.t1	P					Actinidia19612.t1	P
Actinidia04698.t1	P					Actinidia20981.t1	P
Actinidia04890.t1	E+					Actinidia21111.t1	P
Actinidia05278.t1	P					Actinidia21529.t1	P
Actinidia05301.t1	P					Actinidia22918.t1	P
Actinidia05343.t1	P					Actinidia23933.t1	E
Actinidia05428.t1	P					Actinidia24301.t1	P
Actinidia05532.t1	P					Actinidia25436.t1	P
Actinidia05549.t1	P					Actinidia25477.t1	P
Actinidia05551.t1	P					Actinidia25528.t1	P
Actinidia05625.t1	P					Actinidia25867.t1	P
Actinidia05689.t1	P					Actinidia26189.t1	P
Actinidia05748.t1	E					Actinidia27070.t1	P
Actinidia05786.t1	P					Actinidia27141.t1	E
Actinidia05956.t1	P					Actinidia27553.t1	E
Actinidia06485.t1	P					Actinidia28084.t1	P
Actinidia06778.t1	P					Actinidia29766.t1	P
Actinidia07529.t1	P					Actinidia30486.t1	E+
Actinidia07656.t1	E					Actinidia31220.t1	P
Actinidia07826.t1	P					Actinidia31302.t1	DYW
Actinidia07837.t1	E+					Actinidia31333.t1	P
Actinidia07859.t1	P					Actinidia31796.t1	E+
Actinidia08123.t1	P					Actinidia32109.t1	P
Actinidia08478.t1	E+					Actinidia32551.t1	P
Actinidia08538.t1	E+					Actinidia32795.t1	P
Actinidia08731.t1	P					Actinidia33264.t1	P
Actinidia08976.t1	P					Actinidia34976.t1	P
Actinidia09043.t1	E					Actinidia35523.t1	P
Actinidia09237.t1	E+					Actinidia36037.t1	P
Actinidia09281.t1	E+					Actinidia36218.t1	P
Actinidia10267.t1	P					Actinidia36802.t1	DYW
Actinidia10357.t2	P					Actinidia36956.t1	DYW
Actinidia11313.t1	P					Actinidia39312.t1	P
Actinidia11685.t1	P					Actinidia39525.t1	E
Actinidia12716.t1	P					Actinidia39996.t1	P
Actinidia12757.t1	P					Actinidia40130.t1	P
Actinidia12769.t1	E					Actinidia05776.t1	P
Actinidia13116.t1	E
Actinidia13132.t1	P
Actinidia13711.t1	E
Actinidia14816.t1	P
Actinidia14898.t1	E
Actinidia15078.t1	P
Actinidia15159.t1	E+
Actinidia15216.t1	P
Actinidia15339.t1	P
Actinidia15367.t1	E+
Actinidia15634.t1	E+
Actinidia15687.t1	P
Actinidia16202.t1	P
Actinidia16320.t1	E
Actinidia16375.t1	P
Actinidia16861.t1	P
Actinidia16879.t1	E
Actinidia17234.t1	P
Actinidia17852.t1	P
Actinidia17915.t1	P
Actinidia17956.t1	P
Actinidia18032.t1	E
Actinidia18033.t1	E
Actinidia18106.t1	P
Actinidia18293.t1	E+
Actinidia18390.t1	DYW
Actinidia18579.t1	E
Actinidia18704.t1	P
Actinidia18764.t1	P
Actinidia18849.t1	E
Actinidia18966.t1	E+
Actinidia19062.t1	P
Actinidia19198.t1	E
Actinidia19216.t1	E+
Actinidia19611.t1	P
Actinidia19669.t1	P
Actinidia19705.t1	E
Actinidia19717.t1	P
Actinidia20025.t1	P
Actinidia20162.t1	P
Actinidia20225.t1	DYW
Actinidia20320.t1	E
Actinidia20465.t1	P
Actinidia20495.t1	E
Actinidia20935.t1	P
Actinidia21102.t1	P
Actinidia21299.t3	P
Actinidia22089.t1	DYW
Actinidia22304.t1	E
Actinidia23019.t1	P
Actinidia23109.t1	P
Actinidia23519.t1	E+
Actinidia23726.t1	E
Actinidia23773.t1	P
Actinidia23849.t1	E+
Actinidia23941.t1	P
Actinidia24041.t2	P
Actinidia24081.t1	P
Actinidia24389.t1	DYW
Actinidia24456.t1	P
Actinidia24491.t1	P
Actinidia24889.t1	P
Actinidia25020.t1	E
Actinidia25143.t1	P
Actinidia25367.t1	P
Actinidia25755.t1	P
Actinidia25862.t1	P
Actinidia26149.t1	P
Actinidia26187.t1	E+
Actinidia28087.t1	P
Actinidia28434.t1	E
Actinidia28812.t1	P
Actinidia29032.t1	P
Actinidia29389.t2	P
Actinidia29423.t1	E
Actinidia29740.t1	E+
Actinidia29998.t1	E+
Actinidia30329.t1	P
Actinidia30489.t1	P
Actinidia30813.t1	P
Actinidia31096.t1	E+
Actinidia31566.t1	P
Actinidia32089.t1	P
Actinidia32677.t1	P
Actinidia32678.t1	P
Actinidia32859.t1	P
Actinidia33047.t1	E+
Actinidia33505.t1	E+
Actinidia33592.t1	DYW
Actinidia33659.t1	E+
Actinidia33760.t2	P
Actinidia34037.t3	P
Actinidia34114.t1	P
Actinidia34201.t1	E
Actinidia34295.t3	P
Actinidia34412.t1	E
Actinidia34431.t1	DYW
Actinidia34496.t1	P
Actinidia34673.t1	E+
Actinidia34693.t1	P
Actinidia34749.t1	P
Actinidia34755.t1	P
Actinidia35012.t1	P
Actinidia35252.t1	P
Actinidia35406.t1	P
Actinidia35565.t1	P
Actinidia35774.t1	DYW
Actinidia35825.t1	DYW
Actinidia36147.t1	P
Actinidia36290.t1	P
Actinidia36510.t1	E
Actinidia37413.t1	P
Actinidia37630.t1	E
Actinidia37703.t1	E+
Actinidia37914.t1	P
Actinidia37949.t1	P
Actinidia38240.t1	E
Actinidia38410.t1	P
Actinidia38807.t1	P
Actinidia39218.t1	P
Actinidia39289.t1	E
Actinidia39878.t1	P
Actinidia39996.t1	P
Actinidia00395.t1	P
Actinidia01285.t1	P
Actinidia01390.t1	P
Actinidia01778.t1	DYW
Actinidia02289.t1	P

## Sheet: Sheet1
Table S3: Detailed information of PPRs modules during the fruit development and maturation of Actinidia chinensis

## Sheet: S4
Table S4: Differentially expressed PPR genes in response to Psa infection
Kiwifruit	Infection Time	Gene	logFC	logCPM	F	PValue
HT	48	Actinidia00669	-1.57098	11.885	47.4591	0.0426906
HT	48	Actinidia04470	1.87669	11.8169	38.1968	0.043431
HT	48	Actinidia04930	-1.17021	13.0347	18.8343	0.00717343
HT	96	Actinidia04930	-1.09138	13.0798	17.6958	0.0121672
HT	24	Actinidia05278	-1.48793	13.5644	16.6268	0.00243109
HT	48	Actinidia05278	-2.2451	13.3515	35.8159	0.000301029
HT	96	Actinidia05278	-2.27176	13.3762	34.7247	0.00023669
HT	48	Actinidia05776	-1.3152	13.2	27.3196	0.00128605
HY	48	Actinidia05776	-0.911689	12.8571	29.8092	0.0447796
HT	96	Actinidia05776	-1.0268	13.31	21.499	0.00942025
HT	24	Actinidia08478	-1.76439	12.0483	15.132	0.0170222
HT	48	Actinidia08478	-2.88252	11.8713	39.4705	0.000856317
HT	96	Actinidia08478	-2.02462	12.0038	27.7838	0.0084683
HY	96	Actinidia08478	-1.48371	12.8212	5.97922	0.0333386
HT	24	Actinidia08649	1.07298	13.3119	8.97071	0.0140899
HY	12	Actinidia12756	-5.17247	11.8391	15.8127	0.00461336
HT	24	Actinidia12757	-4.54014	11.5514	6.49101	0.035818
HT	96	Actinidia12757	-4.54444	11.5465	6.08561	0.04329
HT	12	Actinidia13697	-2.60623	11.9948	9.96446	0.0158035
HT	24	Actinidia13697	-2.05285	11.7806	7.39593	0.0223831
HT	48	Actinidia13697	-2.16119	11.7265	9.08209	0.0162905
HT	96	Actinidia13697	-1.96555	11.7865	8.32258	0.0241391
HY	96	Actinidia14588	2.51385	11.6208	50.132	0.0223513
HY	12	Actinidia16224	-1.959	12.5314	9.15066	0.0134776
HY	24	Actinidia16224	-2.17043	12.4176	11.2321	0.00850668
HY	48	Actinidia16224	-2.02871	12.4612	9.79114	0.011926
HY	96	Actinidia16224	-2.21801	12.4695	11.262	0.00676364
HT	48	Actinidia16375	1.46312	12.6422	32.2018	0.0114144
HT	96	Actinidia16375	1.45017	12.6365	32.5049	0.0130746
HT	48	Actinidia16582	-1.45407	12.3775	10.4764	0.0140867
HY	48	Actinidia17915	-0.399208	15.1138	5.21128	0.0479326
HT	12	Actinidia17999	2.07361	12.6294	51.1533	0.00192914
HT	24	Actinidia17999	2.02215	12.6034	39.2511	0.00136051
HT	48	Actinidia17999	1.93175	12.553	65.9796	0.0023735
HT	96	Actinidia17999	1.62643	12.3815	49.6185	0.015602
HT	24	Actinidia18033	1.79292	11.982	23.4168	0.0341855
HT	48	Actinidia18033	2.05746	12.1044	63.739	0.0107657
HT	96	Actinidia18033	1.72906	11.9538	29.5094	0.0430144
HY	12	Actinidia18285	-0.782155	15.6004	24.1549	0.000702366
HY	24	Actinidia18285	-0.409965	15.7443	9.61565	0.0127069
HY	48	Actinidia18285	-0.402042	15.7522	11.5849	0.00766263
HY	96	Actinidia18285	-1.01832	15.5009	49.0622	2.78e-05
HT	48	Actinidia18293	1.60512	12.4252	35.2405	0.0135953
HT	96	Actinidia18293	1.37187	12.3065	22.6969	0.0437401
HT	12	Actinidia18849	-0.943389	16.2732	6.37777	0.0304589
HY	24	Actinidia18849	-0.945201	13.1509	17.2214	0.0170958
HT	48	Actinidia18849	-1.11689	16.113	9.10576	0.0161923
HY	48	Actinidia18849	-1.52264	12.9914	40.5809	0.000516387
HT	96	Actinidia18849	-0.829914	16.2393	5.39465	0.0454558
HT	24	Actinidia18966	-1.44555	13.6334	26.5039	0.000496301
HT	48	Actinidia18966	-1.24989	13.6601	20.0254	0.00195614
HT	96	Actinidia18966	-1.13478	13.7171	19.7722	0.0016323
HY	24	Actinidia19062	1.41572	12.1891	71.2678	0.0390197
HY	48	Actinidia19062	1.51128	12.2427	76.4078	0.0259682
HT	12	Actinidia19198	0.950778	13.9812	8.32104	0.0165197
HT	24	Actinidia19198	-0.861705	13.1298	5.50828	0.0440912
HT	48	Actinidia19198	-2.4376	12.7221	26.8833	0.000779686
HY	48	Actinidia19198	-1.93822	12.2166	73.3048	0.00257265
HT	96	Actinidia19198	-1.04502	13.0634	7.80598	0.0210389
HY	96	Actinidia19198	-1.96086	12.2519	42.5603	0.0028118
HT	12	Actinidia20495	-2.08204	12.1394	42.2469	0.0250881
HT	48	Actinidia22399	-2.52595	11.3147	94.7271	0.0402378
HT	96	Actinidia22399	-2.68818	11.3461	69.4132	0.0346989
HT	48	Actinidia23933	-1.10014	12.8342	23.587	0.0200309
HT	12	Actinidia24301	1.40452	13.4642	41.0122	0.00121716
HY	24	Actinidia24301	0.98016	13.1031	25.2767	0.0240489
HY	48	Actinidia24301	1.17375	13.2204	41.7522	0.00555541
HT	24	Actinidia24491	1.28143	12.7699	26.1587	0.0176975
HT	48	Actinidia24491	1.33852	12.8052	36.204	0.0116021
HT	12	Actinidia24889	1.2735	13.954	35.8598	0.000268102
HY	12	Actinidia25020	2.09263	12.7686	62.3002	0.000262421
HY	24	Actinidia25020	2.65774	13.177	159.767	4.95e-07
HT	48	Actinidia25020	1.53453	12.9016	9.99723	0.0129778
HY	48	Actinidia25020	3.02571	13.4504	204.75	1.46e-07
HT	96	Actinidia25020	1.21356	12.7133	6.05227	0.0363031
HY	96	Actinidia25020	2.38147	12.9628	24.3089	0.000505717
HT	96	Actinidia25862	0.615664	14.858	5.27563	0.0474089
HY	24	Actinidia26187	-0.930184	13.0447	22.4284	0.0247292
HY	48	Actinidia26187	-1.24308	12.9587	61.3167	0.00463434
HY	96	Actinidia26187	-1.33618	12.9613	39.2657	0.00318712
HY	96	Actinidia26189	-0.764652	13.5521	23.6133	0.0279185
HY	96	Actinidia27141	2.11993	12.0009	25.7553	0.0111449
HT	12	Actinidia28434	0.850345	13.5233	18.6516	0.0389886
HY	24	Actinidia28434	0.952865	13.0524	20.0991	0.0313513
HY	48	Actinidia28434	1.01846	13.091	47.9217	0.0207589
HY	96	Actinidia28434	1.0606	13.1144	32.7358	0.0165637
HT	12	Actinidia29423	-1.2161	14.5825	28.3248	0.000356022
HT	24	Actinidia29423	-1.32182	14.423	22.4003	0.000901504
HY	24	Actinidia29423	-1.11844	15.1776	31.9889	0.000311502
HT	48	Actinidia29423	-0.650832	14.6581	15.9099	0.00516311
HY	48	Actinidia29423	-1.35537	15.1051	34.7646	0.000217284
HY	24	Actinidia32089	-1.00602	13.044	23.9264	0.0153342
HY	48	Actinidia32089	-1.42466	12.9329	57.4814	0.00145186
HT	96	Actinidia32678	-0.843754	13.3183	6.43973	0.0322538
HT	12	Actinidia34976	-1.57009	12.3248	31.0059	0.0471878
HT	96	Actinidia35252	1.3117	14.1014	7.21459	0.0250896
HT	96	Actinidia35523	1.40757	12.3086	33.8589	0.0390264
HT	24	Actinidia36281	-1.9365	11.6669	33.8092	0.0405662
HT	24	Actinidia37949	-3.45722	11.2167	6.20565	0.0390351
HT	96	Actinidia37949	-3.34686	11.2154	6.99126	0.0268677
HT	24	Actinidia38240	-2.21882	11.9759	6.76182	0.027361
HT	48	Actinidia38240	-2.18123	11.9414	6.29504	0.035806

## Sheet: S5
Table S5: Detailed information of identified RNA editing sites in chloroplast of kiwifruit
Chr	Strand	Name	Genome_pos	Gene_pos	AA_pos	Phase	Ref->Alt	RefCodon->AltCodon	RefAA->AltAA	AltRatio	Depth	Pvalue(fisher)	Function
KP297245	-	matK	2405	454	152	1	C->T	CAC->TAC	H->Y	0.8	145	9.69647e-54	maturase
KP297245	-	matK	2149	710	237	2	C->T	TCT->TTT	S->F	0.185	200	1.16102e-12	maturase
KP297245	-	matK	1616	1243	415	1	C->T	CAT->TAT	H->Y	0.69863	219	1.99197e-65	maturase
KP297245	-	atpA	10945	791	264	2	C->T	CCC->CTC	P->L	0.983137	593	0	ATP synthase CF1 subunit alpha
KP297245	-	atpF	12988	92	31	2	C->T	CCA->CTA	P->L	0.928731	898	0	ATP synthase CF0 subunit I
KP297245	-	atpI	15584	29	10	2	C->T	ACA->ATA	T->I	0.264286	140	4.67265e-13	ATP synthase CF0 subunit IV
KP297245	-	rps2	16402	134	45	2	C->T	ACA->ATA	T->I	1	83	1.72898e-49	ribosomal protein S2
KP297245	-	rps2	16288	248	83	2	C->T	TCA->TTA	S->L	0.935252	139	3.15504e-69	ribosomal protein S2
KP297245	-	rpoC2	18040	2843	948	2	C->T	TCT->TTT	S->F	0.943878	196	1.40717e-99	RNA polymerase b'-subunit
KP297245	-	rpoC2	17161	3722	1241	2	C->T	TCA->TTA	S->L	0.953608	194	5.28084e-101	RNA polymerase b'-subunit
KP297245	-	rpoC1	23808	62	21	2	C->T	TCA->TTA	S->L	0.884146	164	1.25817e-72	RNA polymerase b'-subunit
KP297245	-	rpoB	26750	338	113	2	C->T	TCT->TTT	S->F	0.939227	181	6.21261e-91	RNA polymerase b-subunit
KP297245	-	rpoB	26615	473	158	2	C->T	TCA->TTA	S->L	0.944056	143	9.47197e-73	RNA polymerase b-subunit
KP297245	-	rpoB	26537	551	184	2	C->T	TCA->TTA	S->L	0.934307	137	4.41874e-68	RNA polymerase b-subunit
KP297245	-	rpoB	26522	566	189	2	C->T	TCG->TTG	S->L	0.918239	159	4.87266e-76	RNA polymerase b-subunit
KP297245	-	rpoB	25088	2000	667	2	C->T	TCT->TTT	S->F	0.982456	114	2.92948e-64	RNA polymerase b-subunit
KP297245	+	psbZ	36580	50	17	2	C->T	TCA->TTA	S->L	0.369318	176	3.6742e-23	photosystem II protein Z
KP297245	-	rps14	37757	80	27	2	C->T	TCA->TTA	S->L	0.929047	451	1.13987e-220	ribosomal protein S14
KP297245	-	rps14	37688	149	50	2	C->T	CCA->CTA	P->L	0.946381	373	1.79638e-190	ribosomal protein S14
KP297245	-	ndhK	51074	81	27	3	C->T	TTC->TTT	F->F	0.96875	96	4.34509e-52	NADH-plastoquinone oxidoreductase subunit K
KP297245	-	ndhC	51357	40	14	1	C->T	CTA->TTA	L->L	0.466667	150	2.0237e-26	NADH-plastoquinone oxidoreductase subunit 3
KP297245	-	ndhC	51074	323	108	2	C->T	TCA->TTA	S->L	0.96875	96	4.34509e-52	NADH-plastoquinone oxidoreductase subunit 3
KP297245	+	psaI	60762	80	27	2	C->T	TCT->TTT	S->F	0.769231	52	2.07459e-18	photosystem I reaction center subunit VIII
KP297245	+	psaI	60767	85	29	1	C->T	CAT->TAT	H->Y	0.5	52	2.1991e-10	photosystem I reaction center subunit VIII
KP297245	+	cemA	62574	180	60	3	C->T	TTC->TTT	F->F	0.339806	103	8.8491e-13	envelope membrane protein
KP297245	-	psbF	65667	77	26	2	C->T	TCT->TTT	S->F	0.716312	141	2.55502e-43	photosystem II cytochrome b559 beta subunit
KP297245	-	psbE	65791	214	72	1	C->T	CCT->TCT	P->S	0.828767	146	1.83426e-57	photosystem II cytochrome b559 alpha subunit
KP297245	+	petL	67299	5	2	2	C->T	CCT->CTT	P->L	0.814815	108	2.09531e-41	cytochrome b6-f complex subunit 6
KP297245	+	rps18	69799	257	86	2	C->T	TCG->TTG	S->L	0.700893	224	3.13988e-67	ribosomal protein S18
KP297245	+	rps12	144885	221	74	2	C->T	TCA->TTA	S->L	0.976923	260	3.8723e-144	ribosomal protein S12
KP297245	+	petB	77498	15	5	3	C->T	GTC->GTT	V->V	0.232472	542	3.10319e-42	cytochrome b6
KP297245	+	petB	78097	614	205	2	C->T	CCA->CTA	P->L	0.975945	582	1.19563886293582e-321	cytochrome b6
KP297245	-	rpoA	80640	200	67	2	C->T	TCT->TTT	S->F	0.822581	124	3.03172e-48	RNA polymerase a-subunit
KP297245	-	rps8	82298	182	61	2	C->T	TCA->TTA	S->L	0.954717	265	2.7478e-138	ribosomal protein S8
KP297245	-	rpl23	88013	89	30	2	C->T	TCA->TTA	S->L	0.891566	83	1.50206e-37	ribosomal protein L23
KP297245	-	ndhB	99099	149	50	2	C->T	TCA->TTA	S->L	0.898305	59	3.39122e-27	NADH-plastoquinone oxidoreductase subunit 2
KP297245	-	ndhB	98781	467	156	2	C->T	CCA->CTA	P->L	0.873016	63	1.76292e-27	NADH-plastoquinone oxidoreductase subunit 2
KP297245	-	ndhB	98662	586	196	1	C->T	CAT->TAT	H->Y	0.541667	48	1.33406e-10	NADH-plastoquinone oxidoreductase subunit 2
KP297245	-	ndhB	98637	611	204	2	C->T	TCA->TTA	S->L	0.888889	54	2.01401e-24	NADH-plastoquinone oxidoreductase subunit 2
KP297245	-	ndhB	98502	746	249	2	C->T	TCT->TTT	S->F	0.865854	82	4.19074e-35	NADH-plastoquinone oxidoreductase subunit 2
KP297245	-	ndhB	97739	830	277	2	C->T	TCA->TTA	S->L	0.880952	42	9.13651e-19	NADH-plastoquinone oxidoreductase subunit 2
KP297245	-	ndhB	97088	1481	494	2	C->T	CCA->CTA	P->L	0.836364	55	2.79523e-22	NADH-plastoquinone oxidoreductase subunit 2
KP297245	-	ndhF	114741	290	97	2	C->T	TCA->TTA	S->L	0.357143	28	0.000368554	NADH-plastoquinone oxidoreductase subunit 5
KP297245	+	ccsA	117705	790	264	1	C->T	CGA->TGA	R->*	0.112676	71	0.00317179	heme attachment to plastid cytochrome c
KP297245	+	ccsA	117798	883	295	1	T->A	TTA->ATA	L->I	0.3125	48	8.35728e-06	heme attachment to plastid cytochrome c
KP297245	-	ndhD	119593	2	1	2	C->T	ACG->ATG	T->M	0.492537	67	5.84271e-13	NADH-plastoquinone oxidoreductase subunit 4
KP297245	-	ndhD	119212	383	128	2	C->T	TCA->TTA	S->L	0.846154	78	4.7014e-32	NADH-plastoquinone oxidoreductase subunit 4
KP297245	-	ndhD	118717	878	293	2	C->T	TCA->TTA	S->L	0.936508	63	1.27007e-31	NADH-plastoquinone oxidoreductase subunit 4
KP297245	-	ndhD	118708	887	296	2	C->T	CCT->CTT	P->L	0.955224	67	3.65349e-35	NADH-plastoquinone oxidoreductase subunit 4
KP297245	-	ndhD	118285	1310	437	2	C->T	TCA->TTA	S->L	0.927273	55	4.61929e-27	NADH-plastoquinone oxidoreductase subunit 4
KP297245	-	ndhD	118125	1470	490	3	C->T	GTC->GTT	V->V	0.159091	44	0.00603632	NADH-plastoquinone oxidoreductase subunit 4
KP297245	-	ndhA	124084	341	114	2	C->T	TCA->TTA	S->L	0.867925	106	1.85813e-45	NADH-plastoquinone oxidoreductase subunit 1
KP297245	-	ndhA	122774	566	189	2	C->T	TCA->TTA	S->L	0.208333	168	4.02724e-12	NADH-plastoquinone oxidoreductase subunit 1
KP297245	-	ndhH	125103	505	169	1	C->T	CAT->TAT	H->Y	0.9375	128	4.07955e-64	NADH-plastoquinone oxidoreductase subunit 7
KP297245	+	ndhB	146539	149	50	2	C->T	TCA->TTA	S->L	0.9	30	4.61338e-14	NADH-plastoquinone oxidoreductase subunit 2
KP297245	+	ndhB	146857	467	156	2	C->T	CCA->CTA	P->L	0.846154	39	2.99264e-16	NADH-plastoquinone oxidoreductase subunit 2
KP297245	+	ndhB	146976	586	196	1	C->T	CAT->TAT	H->Y	0.56	50	1.77542e-11	NADH-plastoquinone oxidoreductase subunit 2
KP297245	+	ndhB	147001	611	204	2	C->T	TCA->TTA	S->L	0.785714	42	1.81208e-15	NADH-plastoquinone oxidoreductase subunit 2
KP297245	+	ndhB	147136	746	249	2	C->T	TCT->TTT	S->F	0.944444	90	1.27325e-45	NADH-plastoquinone oxidoreductase subunit 2
KP297245	+	ndhB	147899	830	277	2	C->T	TCA->TTA	S->L	0.945205	73	2.30137e-37	NADH-plastoquinone oxidoreductase subunit 2
KP297245	+	ndhB	148550	1481	494	2	C->T	CCA->CTA	P->L	0.866667	30	3.92138e-13	NADH-plastoquinone oxidoreductase subunit 2
